# Supplementary material for: Commonalities in biomarkers and phenotypes between mild cognitive impairment and cerebral palsy: a pilot exploratory study
Source: publisher site journal article supplement (doi:10.18632/aging.202563), 2021-01-26
Supplement: Supplementary file [file aging-v13i2-202563-supplementary-material-SD1.pdf]

## SUPPLEMENTARY TABLES

**Supplementary Table 1A. Shared and distinct biomarkers, neurocognitive, and anthropometric measures between adults with CP and MCI.**

| Dependent variable: Biomarkers / Neurocognitive /Anthropometric measures | Models | Independent variable: CP versus MCI cohorts |                                      |                       |                              |                                                 |
|--------------------------------------------------------------------------|--------|---------------------------------------------|--------------------------------------|-----------------------|------------------------------|-------------------------------------------------|
|                                                                          |        | $\beta$ (95% CI)                            | <i>P</i> -value of regression models | <i>R</i> <sup>2</sup> | <i>R</i> <sup>2</sup> Change | <i>P</i> -value of <i>R</i> <sup>2</sup> Change |
| Log-transformed hs-CRP                                                   | 1      | 0.216(0.011-0.421)                          | 0.039*                               | 0.052                 | 0.052                        | 0.039**                                         |
|                                                                          | 2      | 0.231(0.021-0.44)                           | 0.031*                               | 0.059                 | 0.007                        | 0.459                                           |
|                                                                          | 3      | 0.242(-0.066-0.55)                          | 0.121                                | 0.059                 | 0                            | 0.921                                           |
| Log-transformed BDNF                                                     | 1      | 4.28(3.779-4.781)                           | <0.001***                            | 0.783                 | 0.783                        | <0.001***                                       |
|                                                                          | 2      | 4.321(3.81-4.833)                           | <0.001***                            | 0.785                 | 0.002                        | 0.407                                           |
|                                                                          | 3      | 4.149(3.4-4.899)                            | <0.001***                            | 0.786                 | 0.001                        | 0.532                                           |
| Semantic Fluency#                                                        | 1      | -3.462(-5.396--1.529)                       | 0.001**                              | 0.137                 | 0.137                        | 0.001**                                         |
|                                                                          | 2      | -3.29(-5.263--1.318)                        | 0.001**                              | 0.146                 | 0.009                        | 0.368                                           |
|                                                                          | 3      | -1.015(-3.825-1.795)                        | 0.474                                | 0.196                 | 0.051                        | 0.03*                                           |
| WAIS-V Block Design                                                      | 1      | -13.064(-18.099--8.029)                     | <0.001***                            | 0.25                  | 0.25                         | <0.001***                                       |
|                                                                          | 2      | -12.202(-17.266--7.137)                     | <0.001***                            | 0.278                 | 0.029                        | 0.081                                           |
|                                                                          | 3      | -3.243(-10.144-3.657)                       | 0.352                                | 0.379                 | 0.1                          | 0.001**                                         |
| BMI (kg/m <sup>2</sup> )                                                 | 1      | -0.51(-2.667-1.648)                         | 0.639                                | 0.003                 | 0.003                        | 0.639                                           |
|                                                                          | 2      | -0.656(-2.862-1.55)                         | 0.556                                | 0.009                 | 0.006                        | 0.493                                           |
|                                                                          | 3      | -1.709(-4.932-1.513)                        | 0.294                                | 0.019                 | 0.01                         | 0.374                                           |
| Resting heart rate (bpm)                                                 | 1      | -7.616(-12.335--2.896)                      | 0.002**                              | 0.114                 | 0.114                        | 0.002**                                         |
|                                                                          | 2      | -7.535(-12.374--2.696)                      | 0.003**                              | 0.115                 | 0                            | 0.863                                           |
|                                                                          | 3      | -3.445(-10.437-3.548)                       | 0.33                                 | 0.143                 | 0.028                        | 0.114                                           |
| Systolic blood pressure                                                  | 1      | 15.377(6.682-24.072)                        | 0.001**                              | 0.134                 | 0.134                        | 0.001**                                         |
|                                                                          | 2      | 17.401(8.802-25.999)                        | <0.001***                            | 0.195                 | 0.061                        | 0.017*                                          |
|                                                                          | 3      | 21.825(9.273-34.377)                        | 0.001**                              | 0.204                 | 0.009                        | 0.338                                           |
| Diastolic blood pressure                                                 | 1      | -2.445(-7.014-2.123)                        | 0.29                                 | 0.014                 | 0.014                        | 0.29                                            |
|                                                                          | 2      | -2.083(-6.749-2.583)                        | 0.377                                | 0.022                 | 0.008                        | 0.423                                           |
|                                                                          | 3      | 0.758(-6.037-7.553)                         | 0.825                                | 0.038                 | 0.016                        | 0.256                                           |
| Natural log-transformed delta FHS score                                  | 1      | 1.86(1.511-2.209)                           | <0.001***                            | 0.584                 | 0.584                        | <0.001***                                       |
|                                                                          | 2      | 1.94(1.594-2.285)                           | <0.001***                            | 0.612                 | 0.028                        | 0.019**                                         |
|                                                                          | 3      | 2.184(1.682-2.686)                          | <0.001***                            | 0.621                 | 0.009                        | 0.186                                           |

Footnotes: CP= cerebral palsy; MCI=mild cognitive impairment; hs-CRP=high-sensitivity C-reactive protein; BDNF=brain-derived neurotrophic factor; #Semantic fluency (60-second animal naming); WAIS= Wechsler Adult Intelligence Scale; BMI= Body-mass index; bpm= beats per minute; FHS=Framingham heart study; 95% CI=95% confidence interval. \* indicates <0.05, \*\* indicates <0.01, \*\*\* indicates <0.001. Model 1: no covariates, Model 2: added gender, Model 3: added years of formal education (in years).

**Supplementary Table 1B. Associations of hs-CRP with biomarker, neurocognitive, and anthropometric measures.**

| Dependent variable:<br>Biomarkers / Neurocognitive /<br>Anthropometric measures | Models | Independent variable: Log-transformed hs-CRP |                              |                |                       |                                  |
|---------------------------------------------------------------------------------|--------|----------------------------------------------|------------------------------|----------------|-----------------------|----------------------------------|
|                                                                                 |        | $\beta$ (95% CI)                             | P-value of regression models | R <sup>2</sup> | R <sup>2</sup> Change | P-value of R <sup>2</sup> Change |
| Log-transformed BDNF                                                            | 1      | 1.45(0.359-2.54)                             | 0.01*                        | 0.08           | 0.08                  | 0.01*                            |
|                                                                                 | 2      | 1.475(0.388-2.562)                           | 0.008**                      | 0.099          | 0.019                 | 0.202                            |
|                                                                                 | 3      | 0.937(0.099-1.776)                           | 0.029*                       | 0.486          | 0.386                 | <0.001***                        |
|                                                                                 | 4      | 0.428(-0.116-0.972)                          | 0.122                        | 0.793          | 0.307                 | <0.001***                        |
| Semantic Fluency#                                                               | 1      | -2.683(-4.8--0.566)                          | 0.014*                       | 0.074          | 0.074                 | 0.014*                           |
|                                                                                 | 2      | -2.745(-4.842--0.647)                        | 0.011*                       | 0.104          | 0.03                  | 0.108                            |
|                                                                                 | 3      | -2.135(-4.112--0.159)                        | 0.035*                       | 0.236          | 0.133                 | <0.001***                        |
|                                                                                 | 4      | -2.071(-4.09--0.052)                         | 0.045*                       | 0.238          | 0.001                 | 0.716                            |
| WAIS-V Block Design                                                             | 1      | -5.34(-11.368-0.688)                         | 0.082                        | 0.037          | 0.037                 | 0.082                            |
|                                                                                 | 2      | -5.607(-11.446-0.232)                        | 0.06                         | 0.11           | 0.072                 | 0.013*                           |
|                                                                                 | 3      | -3.157(-8.113-1.8)                           | 0.209                        | 0.385          | 0.275                 | <0.001***                        |
|                                                                                 | 4      | -2.834(-7.884-2.215)                         | 0.267                        | 0.389          | 0.004                 | 0.469                            |
| BMI (kg/m <sup>2</sup> )                                                        | 1      | 3.825(1.706-5.943)                           | 0.001**                      | 0.139          | 0.139                 | 0.001**                          |
|                                                                                 | 2      | 3.854(1.728-5.98)                            | 0.001**                      | 0.145          | 0.006                 | 0.449                            |
|                                                                                 | 3      | 3.928(1.76-6.096)                            | 0.001**                      | 0.147          | 0.002                 | 0.684                            |
|                                                                                 | 4      | 4.274(2.103-6.444)                           | <0.001***                    | 0.182          | 0.035                 | 0.073                            |
| Resting heart rate (bpm)                                                        | 1      | -4.421(-9.628-0.787)                         | 0.095                        | 0.034          | 0.034                 | 0.095                            |
|                                                                                 | 2      | -4.497(-9.72-0.726)                          | 0.09                         | 0.042          | 0.008                 | 0.419                            |
|                                                                                 | 3      | -3.179(-8.205-1.846)                         | 0.212                        | 0.149          | 0.107                 | 0.002**                          |
|                                                                                 | 4      | -2.832(-7.95-2.287)                          | 0.274                        | 0.156          | 0.007                 | 0.441                            |
| Systolic blood pressure                                                         | 1      | 9.459(-0.19-19.107)                          | 0.055                        | 0.045          | 0.045                 | 0.055                            |
|                                                                                 | 2      | 9.196(-0.383-18.776)                         | 0.06                         | 0.072          | 0.027                 | 0.134                            |
|                                                                                 | 3      | 7.712(-1.859-17.284)                         | 0.113                        | 0.111          | 0.039                 | 0.068                            |
|                                                                                 | 4      | 5.119(-4.067-14.306)                         | 0.271                        | 0.217          | 0.105                 | 0.002**                          |
| Diastolic blood pressure                                                        | 1      | 0.479(-4.382-5.34)                           | 0.845                        | 0              | 0                     | 0.845                            |
|                                                                                 | 2      | 0.392(-4.474-5.259)                          | 0.873                        | 0.013          | 0.012                 | 0.328                            |
|                                                                                 | 3      | 1(-3.899-5.9)                                | 0.686                        | 0.04           | 0.027                 | 0.143                            |
|                                                                                 | 4      | 0.933(-4.075-5.941)                          | 0.712                        | 0.04           | 0                     | 0.879                            |
| Natural log-transformed delta FHS score                                         | 1      | 0.833(0.292-1.375)                           | 0.003**                      | 0.105          | 0.105                 | 0.003**                          |
|                                                                                 | 2      | 0.833(0.288-1.378)                           | 0.003**                      | 0.105          | 0                     | 0.951                            |
|                                                                                 | 3      | 0.633(0.147-1.12)                            | 0.011*                       | 0.315          | 0.21                  | <0.001***                        |
|                                                                                 | 4      | 0.37(0.009-0.73)                             | 0.045*                       | 0.64           | 0.325                 | <0.001***                        |

Footnotes: CP= cerebral palsy; MCI=mild cognitive impairment; hs-CRP=high-sensitivity C-reactive protein; BDNF=brain-derived neurotrophic factor; #Semantic fluency (60-second animal naming); WAIS= Wechsler Adult Intelligence Scale, BMI= Body-mass index; bpm= beats per minute; FHS=Framingham heart study; 95% CI=95% confidence interval. \* indicates <0.05, \*\* indicates <0.01, \*\*\* indicates <0.00. Model 1: no covariates, Model 2: added gender, Model 3: added years of formal education (in years), Model 4: added "CP VS MCI cohort".

**Supplementary Table 1C. Associations of natural log-transformed delta FHS score with biomarker, neurocognitive, and anthropometric measures for CP cohort.**

| Dependent variable:<br>Biomarkers / Neurocognitive /<br>Anthropometric measures | Models | Independent variable: Natural log-transformed delta FHS score |                                      |                       |                              |                                                 |
|---------------------------------------------------------------------------------|--------|---------------------------------------------------------------|--------------------------------------|-----------------------|------------------------------|-------------------------------------------------|
|                                                                                 |        | $\beta$ (95% CI)                                              | <i>P</i> -value of regression models | <i>R</i> <sup>2</sup> | <i>R</i> <sup>2</sup> Change | <i>P</i> -value of <i>R</i> <sup>2</sup> Change |
| Log-transformed hs-CRP                                                          | 1      | 0.352(-0.257-0.96)                                            | 0.245                                | 0.054                 | 0.054                        | 0.245                                           |
|                                                                                 | 2      | 0.341(-0.298-0.979)                                           | 0.282                                | 0.055                 | 0.001                        | 0.876                                           |
|                                                                                 | 3      | 0.336(-0.465-1.138)                                           | 0.394                                | 0.055                 | 0                            | 0.984                                           |
|                                                                                 | 4      | 0.547(-0.249-1.343)                                           | 0.168                                | 0.188                 | 0.133                        | 0.071                                           |
| Log-transformed BDNF                                                            | 1      | -0.299(-0.789-0.192)                                          | 0.222                                | 0.059                 | 0.059                        | 0.222                                           |
|                                                                                 | 2      | -0.241(-0.744-0.263)                                          | 0.334                                | 0.101                 | 0.042                        | 0.299                                           |
|                                                                                 | 3      | -0.461(-1.071-0.149)                                          | 0.131                                | 0.162                 | 0.061                        | 0.209                                           |
|                                                                                 | 4      | -0.347(-0.976-0.283)                                          | 0.266                                | 0.222                 | 0.06                         | 0.206                                           |
| Semantic Fluency#                                                               | 1      | 6.987(0.767-13.206)                                           | 0.029*                               | 0.176                 | 0.176                        | 0.029*                                          |
|                                                                                 | 2      | 6.756(0.243-13.269)                                           | 0.043*                               | 0.18                  | 0.004                        | 0.747                                           |
|                                                                                 | 3      | 5.394(-2.717-13.505)                                          | 0.182                                | 0.193                 | 0.013                        | 0.554                                           |
|                                                                                 | 4      | 4.674(-3.942-13.291)                                          | 0.273                                | 0.206                 | 0.013                        | 0.556                                           |
| WAIS-V Block Design                                                             | 1      | 8.31(-6.777-23.397)                                           | 0.267                                | 0.049                 | 0.049                        | 0.267                                           |
|                                                                                 | 2      | 8.93(-6.861-24.721)                                           | 0.255                                | 0.054                 | 0.005                        | 0.721                                           |
|                                                                                 | 3      | 2.395(-16.817-21.607)                                         | 0.799                                | 0.111                 | 0.057                        | 0.236                                           |
|                                                                                 | 4      | 3.085(-17.462-23.633)                                         | 0.758                                | 0.114                 | 0.002                        | 0.812                                           |
| BMI (kg/m <sup>2</sup> )                                                        | 1      | -2.211(-9.312-4.89)                                           | 0.527                                | 0.016                 | 0.016                        | 0.527                                           |
|                                                                                 | 2      | -2.121(-9.571-5.33)                                           | 0.562                                | 0.017                 | 0.001                        | 0.912                                           |
|                                                                                 | 3      | -3.007(-12.335-6.321)                                         | 0.512                                | 0.022                 | 0.005                        | 0.737                                           |
|                                                                                 | 4      | -2.856(-12.844-7.131)                                         | 0.559                                | 0.022                 | 0.001                        | 0.915                                           |
| Resting heart rate (bpm)                                                        | 1      | -5.655(-17.291-5.981)                                         | 0.326                                | 0.039                 | 0.039                        | 0.326                                           |
|                                                                                 | 2      | -3.732(-15.398-7.935)                                         | 0.515                                | 0.123                 | 0.084                        | 0.143                                           |
|                                                                                 | 3      | -8.36(-22.591-5.87)                                           | 0.237                                | 0.171                 | 0.049                        | 0.257                                           |
|                                                                                 | 4      | -7.73(-22.939-7.479)                                          | 0.303                                | 0.175                 | 0.003                        | 0.769                                           |
| Systolic blood pressure                                                         | 1      | 7.626(-5.491-20.743)                                          | 0.242                                | 0.054                 | 0.054                        | 0.242                                           |
|                                                                                 | 2      | 5.238(-7.778-18.254)                                          | 0.414                                | 0.155                 | 0.1                          | 0.104                                           |
|                                                                                 | 3      | 7.177(-9.096-23.449)                                          | 0.371                                | 0.161                 | 0.007                        | 0.674                                           |
|                                                                                 | 4      | 6.239(-11.129-23.607)                                         | 0.464                                | 0.167                 | 0.006                        | 0.703                                           |
| Diastolic blood pressure                                                        | 1      | 3.3(-4.938-11.538)                                            | 0.417                                | 0.027                 | 0.027                        | 0.417                                           |
|                                                                                 | 2      | 3.652(-4.969-12.273)                                          | 0.391                                | 0.032                 | 0.006                        | 0.711                                           |
|                                                                                 | 3      | 10.346(0.746-19.946)                                          | 0.036*                               | 0.238                 | 0.206                        | 0.02*                                           |
|                                                                                 | 4      | 8.794(-1.21-18.798)                                           | 0.082                                | 0.279                 | 0.04                         | 0.279                                           |

Footnotes: CP= cerebral palsy; MCI=mild cognitive impairment; hs-CRP=high-sensitivity C-reactive protein; BDNF=brain-derived neurotrophic factor; #Semantic fluency (60-second animal naming); WAIS= Wechsler Adult Intelligence Scale, BMI= Body-mass index; bpm= beats per minute; FHS=Framingham heart study; 95% CI=95% confidence interval. \* indicates <0.05, \*\* indicates <0.01, \*\*\* indicates <0.001. Model 1: no covariates, Model 2: added gender, Model 3: added years of formal education (in years), Model 4: added chronological age (in years).

**Supplementary Table 1D. Associations of natural log-transformed delta FHS score with biomarker, neurocognitive, and anthropometric measures for MCI cohort.**

| Dependent variable:<br>Biomarkers / Neurocognitive /<br>Anthropometric measures | Models | Independent variable: Natural log-transformed delta FHS score |                                      |                       |                              |                                                 |
|---------------------------------------------------------------------------------|--------|---------------------------------------------------------------|--------------------------------------|-----------------------|------------------------------|-------------------------------------------------|
|                                                                                 |        | $\beta$ (95% CI)                                              | <i>P</i> -value of regression models | <i>R</i> <sup>2</sup> | <i>R</i> <sup>2</sup> Change | <i>P</i> -value of <i>R</i> <sup>2</sup> Change |
| Log-transformed hs-CRP                                                          | 1      | 0.073(-0.073-0.218)                                           | 0.321                                | 0.019                 | 0.019                        | 0.321                                           |
|                                                                                 | 2      | 0.069(-0.083-0.22)                                            | 0.368                                | 0.019                 | 0.001                        | 0.842                                           |
|                                                                                 | 3      | 0.07(-0.084-0.223)                                            | 0.367                                | 0.02                  | 0.001                        | 0.851                                           |
|                                                                                 | 4      | 0.071(-0.086-0.227)                                           | 0.368                                | 0.02                  | 0                            | 0.91                                            |
| Log-transformed BDNF                                                            | 1      | 0.193(-0.079-0.465)                                           | 0.161                                | 0.037                 | 0.037                        | 0.161                                           |
|                                                                                 | 2      | 0.236(-0.045-0.516)                                           | 0.098                                | 0.063                 | 0.026                        | 0.237                                           |
|                                                                                 | 3      | 0.244(-0.036-0.524)                                           | 0.086                                | 0.084                 | 0.021                        | 0.281                                           |
|                                                                                 | 4      | 0.262(-0.022-0.546)                                           | 0.07                                 | 0.099                 | 0.015                        | 0.365                                           |
| Semantic Fluency#                                                               | 1      | -0.795(-1.914-0.324)                                          | 0.16                                 | 0.037                 | 0.037                        | 0.16                                            |
|                                                                                 | 2      | -0.933(-2.093-0.227)                                          | 0.113                                | 0.053                 | 0.016                        | 0.356                                           |
|                                                                                 | 3      | -0.998(-2.126-0.129)                                          | 0.082                                | 0.125                 | 0.073                        | 0.045*                                          |
|                                                                                 | 4      | -0.908(-2.043-0.227)                                          | 0.115                                | 0.148                 | 0.023                        | 0.251                                           |
| WAIS-V Block Design                                                             | 1      | 0.974(-2.515-4.464)                                           | 0.578                                | 0.006                 | 0.006                        | 0.578                                           |
|                                                                                 | 2      | -0.367(-3.711-2.978)                                          | 0.827                                | 0.164                 | 0.158                        | 0.003**                                         |
|                                                                                 | 3      | -0.617(-3.761-2.526)                                          | 0.695                                | 0.279                 | 0.114                        | 0.006**                                         |
|                                                                                 | 4      | -0.137(-3.187-2.913)                                          | 0.929                                | 0.347                 | 0.069                        | 0.026*                                          |
| BMI (kg/m <sup>2</sup> )                                                        | 1      | 1.13(-0.251-2.511)                                            | 0.107                                | 0.048                 | 0.048                        | 0.107                                           |
|                                                                                 | 2      | 1.354(-0.069-2.776)                                           | 0.062                                | 0.075                 | 0.027                        | 0.225                                           |
|                                                                                 | 3      | 1.407(-0.008-2.822)                                           | 0.051                                | 0.107                 | 0.032                        | 0.184                                           |
|                                                                                 | 4      | 1.546(0.132-2.96)                                             | 0.033*                               | 0.142                 | 0.035                        | 0.158                                           |
| Resting heart rate (bpm)                                                        | 1      | -1.047(-4.826-2.731)                                          | 0.581                                | 0.006                 | 0.006                        | 0.581                                           |
|                                                                                 | 2      | -2.086(-5.87-1.698)                                           | 0.274                                | 0.087                 | 0.081                        | 0.037*                                          |
|                                                                                 | 3      | -2.139(-5.959-1.68)                                           | 0.266                                | 0.091                 | 0.004                        | 0.62                                            |
|                                                                                 | 4      | -1.833(-5.678-2.012)                                          | 0.343                                | 0.115                 | 0.024                        | 0.251                                           |
| Systolic blood pressure                                                         | 1      | 12.413(5.187-19.639)                                          | 0.001**                              | 0.183                 | 0.183                        | 0.001**                                         |
|                                                                                 | 2      | 11.414(3.941-18.886)                                          | 0.003**                              | 0.2                   | 0.017                        | 0.3                                             |
|                                                                                 | 3      | 11.202(3.715-18.69)                                           | 0.004**                              | 0.215                 | 0.016                        | 0.319                                           |
|                                                                                 | 4      | 10.77(3.184-18.356)                                           | 0.006**                              | 0.226                 | 0.011                        | 0.41                                            |
| Diastolic blood pressure                                                        | 1      | -0.11(-4.246-4.026)                                           | 0.958                                | 0                     | 0                            | 0.958                                           |
|                                                                                 | 2      | -0.722(-4.993-3.549)                                          | 0.736                                | 0.024                 | 0.024                        | 0.267                                           |
|                                                                                 | 3      | -0.846(-5.123-3.432)                                          | 0.693                                | 0.043                 | 0.02                         | 0.309                                           |
|                                                                                 | 4      | -0.13(-4.236-3.977)                                           | 0.95                                 | 0.153                 | 0.109                        | 0.014*                                          |

Footnotes: CP= cerebral palsy; MCI=mild cognitive impairment; hs-CRP=high-sensitivity C-reactive protein; BDNF=brain-derived neurotrophic factor; #Semantic fluency (60-second animal naming); WAIS= Wechsler Adult Intelligence Scale, BMI= Body-mass index; bpm= beats per minute; FHS=Framingham heart study; 95% CI=95% confidence interval. \* indicates <0.05, \*\* indicates <0.01, \*\*\* indicates <0.001. Model 1: no covariates, Model 2: added gender, Model 3: added years of formal education (in years), Model 4: added chronological age (in years).

**Supplementary Table 1E. Associations of BDNF with biomarker, neurocognitive, and anthropometric measures CP cohort.**

| Dependent variable:<br>Biomarkers / Neurocognitive /<br>Anthropometric measures | Models | Independent variable: Log-transformed BDNF |                                      |                       |                              |                                                 |
|---------------------------------------------------------------------------------|--------|--------------------------------------------|--------------------------------------|-----------------------|------------------------------|-------------------------------------------------|
|                                                                                 |        | $\beta$ (95% CI)                           | <i>P</i> -value of regression models | <i>R</i> <sup>2</sup> | <i>R</i> <sup>2</sup> Change | <i>P</i> -value of <i>R</i> <sup>2</sup> Change |
| Log-transformed hs-CRP                                                          | 1      | 0.336(-0.155-0.826)                        | 0.171                                | 0.074                 | 0.074                        | 0.171                                           |
|                                                                                 | 2      | 0.386(-0.125-0.898)                        | 0.132                                | 0.098                 | 0.025                        | 0.427                                           |
|                                                                                 | 3      | 0.374(-0.149-0.897)                        | 0.153                                | 0.108                 | 0.01                         | 0.611                                           |
|                                                                                 | 4      | 0.277(-0.277-0.832)                        | 0.31                                 | 0.154                 | 0.045                        | 0.289                                           |
| Semantic Fluency#                                                               | 1      | 2.12(-3.39-7.63)                           | 0.436                                | 0.025                 | 0.025                        | 0.436                                           |
|                                                                                 | 2      | 2.831(-2.877-8.538)                        | 0.316                                | 0.064                 | 0.04                         | 0.323                                           |
|                                                                                 | 3      | 2.43(-3.145-8.004)                         | 0.377                                | 0.156                 | 0.092                        | 0.127                                           |
|                                                                                 | 4      | 3.702(-2.12-9.523)                         | 0.201                                | 0.221                 | 0.065                        | 0.188                                           |
| WAIS-V Block Design                                                             | 1      | 5.207(-7.203-17.617)                       | 0.396                                | 0.029                 | 0.029                        | 0.396                                           |
|                                                                                 | 2      | 5.4(-7.722-18.521)                         | 0.404                                | 0.03                  | 0.001                        | 0.906                                           |
|                                                                                 | 3      | 4.46(-8.329-17.249)                        | 0.478                                | 0.128                 | 0.099                        | 0.12                                            |
|                                                                                 | 4      | 4.642(-9.261-18.545)                       | 0.496                                | 0.129                 | 0                            | 0.936                                           |
| BMI (kg/m <sup>2</sup> )                                                        | 1      | 3.487(-2.161-9.136)                        | 0.215                                | 0.061                 | 0.061                        | 0.215                                           |
|                                                                                 | 2      | 3.535(-2.439-9.508)                        | 0.234                                | 0.061                 | 0                            | 0.949                                           |
|                                                                                 | 3      | 3.582(-2.557-9.721)                        | 0.24                                 | 0.062                 | 0.001                        | 0.866                                           |
|                                                                                 | 4      | 3.691(-2.983-10.364)                       | 0.264                                | 0.063                 | 0                            | 0.92                                            |
| Resting heart rate (bpm)                                                        | 1      | -0.049(-9.71-9.611)                        | 0.992                                | 0                     | 0                            | 0.992                                           |
|                                                                                 | 2      | -2.137(-11.752-7.478)                      | 0.651                                | 0.114                 | 0.114                        | 0.091                                           |
|                                                                                 | 3      | -2.403(-12.216-7.41)                       | 0.617                                | 0.128                 | 0.013                        | 0.557                                           |
|                                                                                 | 4      | -3.817(-14.321-6.687)                      | 0.459                                | 0.155                 | 0.027                        | 0.411                                           |
| Systolic blood pressure                                                         | 1      | -4.862(-15.658-5.935)                      | 0.363                                | 0.033                 | 0.033                        | 0.363                                           |
|                                                                                 | 2      | -2.579(-13.355-8.196)                      | 0.626                                | 0.139                 | 0.106                        | 0.099                                           |
|                                                                                 | 3      | -2.665(-13.74-8.41)                        | 0.623                                | 0.14                  | 0.001                        | 0.867                                           |
|                                                                                 | 4      | -1.726(-13.703-10.251)                     | 0.768                                | 0.149                 | 0.009                        | 0.631                                           |
| Diastolic blood pressure                                                        | 1      | -5.779(-12.145-0.588)                      | 0.073                                | 0.123                 | 0.123                        | 0.073                                           |
|                                                                                 | 2      | -6.345(-13.013-0.323)                      | 0.061                                | 0.14                  | 0.017                        | 0.498                                           |
|                                                                                 | 3      | -5.966(-12.601-0.668)                      | 0.076                                | 0.195                 | 0.055                        | 0.222                                           |
|                                                                                 | 4      | -4.719(-11.74-2.302)                       | 0.177                                | 0.237                 | 0.042                        | 0.281                                           |
| Natural log-transformed delta FHS score                                         | 1      | -0.198(-0.523-0.127)                       | 0.222                                | 0.059                 | 0.059                        | 0.222                                           |
|                                                                                 | 2      | -0.162(-0.501-0.177)                       | 0.334                                | 0.087                 | 0.028                        | 0.397                                           |
|                                                                                 | 3      | -0.208(-0.484-0.067)                       | 0.131                                | 0.429                 | 0.341                        | 0.001***                                        |
|                                                                                 | 4      | -0.161(-0.455-0.132)                       | 0.266                                | 0.453                 | 0.025                        | 0.33                                            |

Footnotes: CP= cerebral palsy; MCI=mild cognitive impairment; hs-CRP=high-sensitivity C-reactive protein; BDNF=brain-derived neurotrophic factor; #Semantic fluency (60-second animal naming); WAIS= Wechsler Adult Intelligence Scale, BMI= Body-mass index; bpm= beats per minute; FHS=Framingham heart study; 95% CI=95% confidence interval. \* indicates <0.05, \*\* indicates <0.01, \*\*\* indicates <0.001. Model 1: no covariates, Model 2: added gender, Model 3: added years of formal education (in years), Model 4: added chronological age (in years).

**Supplementary Table 1F. Associations of BDNF with biomarker, neurocognitive, and anthropometric measures MCI cohort.**

| Dependent variable:<br>Biomarkers / Neurocognitive /<br>Anthropometric measures | Models | Independent variable: Log-transformed BDNF |                                      |                       |                              |                                                 |
|---------------------------------------------------------------------------------|--------|--------------------------------------------|--------------------------------------|-----------------------|------------------------------|-------------------------------------------------|
|                                                                                 |        | $\beta$ (95% CI)                           | <i>P</i> -value of regression models | <i>R</i> <sup>2</sup> | <i>R</i> <sup>2</sup> Change | <i>P</i> -value of <i>R</i> <sup>2</sup> Change |
| Log-transformed hs-CRP                                                          | 1      | 0.07(-0.075-0.214)                         | 0.337                                | 0.017                 | 0.017                        | 0.337                                           |
|                                                                                 | 2      | 0.074(-0.072-0.221)                        | 0.314                                | 0.023                 | 0.006                        | 0.582                                           |
|                                                                                 | 3      | 0.074(-0.075-0.223)                        | 0.323                                | 0.023                 | 0                            | 0.997                                           |
|                                                                                 | 4      | 0.075(-0.077-0.226)                        | 0.326                                | 0.023                 | 0                            | 0.919                                           |
| Semantic Fluency#                                                               | 1      | -0.928(-2.033-0.177)                       | 0.098                                | 0.051                 | 0.051                        | 0.098                                           |
|                                                                                 | 2      | -0.907(-2.028-0.214)                       | 0.111                                | 0.053                 | 0.002                        | 0.72                                            |
|                                                                                 | 3      | -0.778(-1.889-0.332)                       | 0.166                                | 0.106                 | 0.053                        | 0.089                                           |
|                                                                                 | 4      | -0.854(-1.955-0.247)                       | 0.126                                | 0.146                 | 0.04                         | 0.132                                           |
| WAIS-V Block Design                                                             | 1      | -2.836(-6.228-0.556)                       | 0.099                                | 0.05                  | 0.05                         | 0.099                                           |
|                                                                                 | 2      | -2.321(-5.49-0.848)                        | 0.148                                | 0.197                 | 0.146                        | 0.003**                                         |
|                                                                                 | 3      | -1.781(-4.806-1.244)                       | 0.243                                | 0.296                 | 0.099                        | 0.01*                                           |
|                                                                                 | 4      | -2.107(-5.001-0.786)                       | 0.15                                 | 0.374                 | 0.079                        | 0.016                                           |
| BMI (kg/m <sup>2</sup> )                                                        | 1      | 1.058(-0.32-2.435)                         | 0.129                                | 0.043                 | 0.043                        | 0.129                                           |
|                                                                                 | 2      | 1.014(-0.38-2.408)                         | 0.15                                 | 0.049                 | 0.006                        | 0.555                                           |
|                                                                                 | 3      | 0.918(-0.489-2.325)                        | 0.196                                | 0.068                 | 0.019                        | 0.311                                           |
|                                                                                 | 4      | 0.855(-0.559-2.268)                        | 0.23                                 | 0.086                 | 0.018                        | 0.325                                           |
| Resting heart rate (bpm)                                                        | 1      | -2.128(-5.851-1.594)                       | 0.257                                | 0.024                 | 0.024                        | 0.257                                           |
|                                                                                 | 2      | -1.778(-5.445-1.89)                        | 0.335                                | 0.082                 | 0.058                        | 0.076                                           |
|                                                                                 | 3      | -1.701(-5.436-2.034)                       | 0.365                                | 0.084                 | 0.002                        | 0.76                                            |
|                                                                                 | 4      | -1.935(-5.653-1.783)                       | 0.301                                | 0.118                 | 0.034                        | 0.168                                           |
| Systolic blood pressure                                                         | 1      | 3.907(-3.97-11.784)                        | 0.324                                | 0.018                 | 0.018                        | 0.324                                           |
|                                                                                 | 2      | 4.679(-3.061-12.42)                        | 0.231                                | 0.081                 | 0.063                        | 0.065                                           |
|                                                                                 | 3      | 5.343(-2.424-13.11)                        | 0.173                                | 0.11                  | 0.029                        | 0.206                                           |
|                                                                                 | 4      | 5.798(-1.952-13.548)                       | 0.139                                | 0.139                 | 0.029                        | 0.199                                           |
| Diastolic blood pressure                                                        | 1      | 1.694(-2.393-5.781)                        | 0.409                                | 0.013                 | 0.013                        | 0.409                                           |
|                                                                                 | 2      | 1.948(-2.149-6.046)                        | 0.344                                | 0.038                 | 0.025                        | 0.246                                           |
|                                                                                 | 3      | 2.266(-1.857-6.39)                         | 0.275                                | 0.063                 | 0.025                        | 0.254                                           |
|                                                                                 | 4      | 1.821(-2.123-5.765)                        | 0.358                                | 0.167                 | 0.104                        | 0.016                                           |
| Natural log-transformed delta FHS score                                         | 1      | 0.191(-0.078-0.46)                         | 0.161                                | 0.037                 | 0.037                        | 0.161                                           |
|                                                                                 | 2      | 0.22(-0.042-0.482)                         | 0.098                                | 0.114                 | 0.078                        | 0.038*                                          |
|                                                                                 | 3      | 0.232(-0.034-0.497)                        | 0.086                                | 0.121                 | 0.007                        | 0.522                                           |
|                                                                                 | 4      | 0.246(-0.02-0.512)                         | 0.07                                 | 0.145                 | 0.024                        | 0.243                                           |

Footnotes: CP= cerebral palsy; MCI=mild cognitive impairment; hs-CRP=high-sensitivity C-reactive protein; BDNF=brain-derived neurotrophic factor; #Semantic fluency (60-second animal naming); WAIS= Wechsler Adult Intelligence Scale, BMI= Body-mass index; bpm= beats per minute; FHS=Framingham heart study; 95% CI=95% confidence interval. \* indicates <0.05, \*\* indicates <0.01, \*\*\* indicates <0.001. Model 1: no covariates, Model 2: added gender, Model 3: added years of formal education (in years), Model 4: added chronological age (in years).

**Supplementary Table 2A. Shared and distinct biomarkers, neurocognitive, and anthropometric measures between adults with CP and MCI.**

| Dependent variable: Biomarkers / Neurocognitive /Anthropometric measures | Models | Independent variable: CP versus MCI cohorts |                              |                |                       |                                  |
|--------------------------------------------------------------------------|--------|---------------------------------------------|------------------------------|----------------|-----------------------|----------------------------------|
|                                                                          |        | $\beta$ (95% CI)                            | P-value of regression models | R <sup>2</sup> | R <sup>2</sup> Change | P-value of R <sup>2</sup> Change |
| Log-transformed hs-CRP                                                   | 1      | 0.235(0.037-0.434)                          | 0.021*                       | 0.053          | 0.053                 | 0.021*                           |
|                                                                          | 2      | 0.224(0.019-0.43)                           | 0.033*                       | 0.055          | 0.002                 | 0.664                            |
|                                                                          | 3      | 0.21(-0.106-0.527)                          | 0.191                        | 0.055          | 0                     | 0.907                            |
| Log-transformed BDNF                                                     | 1      | 4.314(3.812-4.815)                          | <0.001***                    | 0.748          | 0.748                 | <0.001***                        |
|                                                                          | 2      | 4.328(3.809-4.848)                          | <0.001***                    | 0.748          | 0                     | 0.818                            |
|                                                                          | 3      | 4.025(3.229-4.821)                          | <0.001***                    | 0.751          | 0.003                 | 0.32                             |
| Semantic Fluency#                                                        | 1      | -4.627(-6.442--2.812)                       | <0.001***                    | 0.207          | 0.207                 | <0.001***                        |
|                                                                          | 2      | -4.795(-6.67--2.919)                        | <0.001***                    | 0.211          | 0.004                 | 0.467                            |
|                                                                          | 3      | -2.818(-5.656-0.02)                         | 0.052                        | 0.238          | 0.026                 | 0.071                            |
| WAIS-V Block Design                                                      | 1      | -4.128(-8.73-0.475)                         | 0.078                        | 0.031          | 0.031                 | 0.078                            |
|                                                                          | 2      | -3.947(-8.714-0.821)                        | 0.104                        | 0.032          | 0.001                 | 0.757                            |
|                                                                          | 3      | 5.057(-1.875-11.989)                        | 0.151                        | 0.137          | 0.104                 | 0.001**                          |
| BMI (kg/m <sup>2</sup> )                                                 | 1      | 0.608(-1.153-2.37)                          | 0.495                        | 0.005          | 0.005                 | 0.495                            |
|                                                                          | 2      | 0.321(-1.489-2.131)                         | 0.726                        | 0.022          | 0.017                 | 0.197                            |
|                                                                          | 3      | -0.213(-2.996-2.57)                         | 0.88                         | 0.024          | 0.003                 | 0.616                            |
| Resting heart rate (bpm)                                                 | 1      | -7.843(-12.293--3.394)                      | 0.001**                      | 0.111          | 0.111                 | 0.001**                          |
|                                                                          | 2      | -7.581(-12.186--2.976)                      | 0.002**                      | 0.113          | 0.002                 | 0.643                            |
|                                                                          | 3      | -5.223(-12.284-1.838)                       | 0.145                        | 0.12           | 0.007                 | 0.384                            |
| Systolic blood pressure                                                  | 1      | 14.778(7.701-21.855)                        | <0.001***                    | 0.149          | 0.149                 | <0.001***                        |
|                                                                          | 2      | 15.413(8.098-22.728)                        | <0.001***                    | 0.153          | 0.004                 | 0.48                             |
|                                                                          | 3      | 23.25(12.187-34.313)                        | <0.001***                    | 0.183          | 0.029                 | 0.066                            |
| Diastolic blood pressure                                                 | 1      | -4.649(-8.384--0.913)                       | 0.015*                       | 0.059          | 0.059                 | 0.015*                           |
|                                                                          | 2      | -4.228(-8.083--0.373)                       | 0.032*                       | 0.066          | 0.008                 | 0.375                            |
|                                                                          | 3      | 0.274(-5.537-6.085)                         | 0.926                        | 0.105          | 0.038                 | 0.045*                           |
| Natural log-transformed delta FHS score                                  | 1      | 1.803(1.506-2.101)                          | <0.001***                    | 0.597          | 0.597                 | <0.001***                        |
|                                                                          | 2      | 1.895(1.596-2.193)                          | <0.001***                    | 0.621          | 0.025                 | 0.014*                           |
|                                                                          | 3      | 2.048(1.59-2.506)                           | <0.001***                    | 0.624          | 0.003                 | 0.383                            |

Footnotes: CP= cerebral palsy; MCI=mild cognitive impairment; hs-CRP=high-sensitivity C-reactive protein; BDNF=brain-derived neurotrophic factor; #Semantic fluency (60-second animal naming); WAIS= Wechsler Adult Intelligence Scale; BMI= Body-mass index; bpm= beats per minute; FHS=Framingham heart study; 95% CI=95% confidence interval. \* indicates <0.05, \*\* indicates <0.01, \*\*\* indicates <0.001. Model 1: no covariates, Model 2: added gender, Model 3: added years of formal education (in years).

**Supplementary Table 2B. Associations of hs-CRP with biomarker, neurocognitive, and anthropometric measures.**

| Dependent variable:<br>Biomarkers / Neurocognitive /<br>Anthropometric measures | Models | Independent variable: Log-transformed hs-CRP |                                      |                       |                              |                                                 |
|---------------------------------------------------------------------------------|--------|----------------------------------------------|--------------------------------------|-----------------------|------------------------------|-------------------------------------------------|
|                                                                                 |        | $\beta$ (95% CI)                             | <i>P</i> -value of regression models | <i>R</i> <sup>2</sup> | <i>R</i> <sup>2</sup> Change | <i>P</i> -value of <i>R</i> <sup>2</sup> Change |
| Log-transformed BDNF                                                            | 1      | 1.339(0.396-2.283)                           | 0.006**                              | 0.075                 | 0.075                        | 0.006**                                         |
|                                                                                 | 2      | 1.256(0.318-2.194)                           | 0.009**                              | 0.105                 | 0.03                         | 0.075                                           |
|                                                                                 | 3      | 0.715(0.008-1.423)                           | 0.048*                               | 0.51                  | 0.405                        | <0.001***                                       |
|                                                                                 | 4      | 0.382(-0.124-0.888)                          | 0.137                                | 0.757                 | 0.247                        | <0.001***                                       |
| Semantic Fluency#                                                               | 1      | -0.927(-2.919-1.064)                         | 0.358                                | 0.009                 | 0.009                        | 0.358                                           |
|                                                                                 | 2      | -0.89(-2.9-1.12)                             | 0.382                                | 0.01                  | 0.001                        | 0.709                                           |
|                                                                                 | 3      | -0.121(-1.956-1.714)                         | 0.896                                | 0.207                 | 0.197                        | <0.001***                                       |
|                                                                                 | 4      | 0.119(-1.706-1.944)                          | 0.897                                | 0.238                 | 0.031                        | 0.053                                           |
| WAIS-V Block Design                                                             | 1      | -1.625(-6.204-2.953)                         | 0.483                                | 0.005                 | 0.005                        | 0.483                                           |
|                                                                                 | 2      | -1.476(-6.09-3.138)                          | 0.527                                | 0.009                 | 0.004                        | 0.512                                           |
|                                                                                 | 3      | -0.169(-4.611-4.274)                         | 0.94                                 | 0.118                 | 0.108                        | 0.001**                                         |
|                                                                                 | 4      | -0.607(-5.064-3.85)                          | 0.787                                | 0.137                 | 0.019                        | 0.146                                           |
| BMI (kg/m <sup>2</sup> )                                                        | 1      | 2.666(1.017-4.315)                           | 0.002**                              | 0.095                 | 0.095                        | 0.002**                                         |
|                                                                                 | 2      | 2.57(0.916-4.223)                            | 0.003**                              | 0.108                 | 0.013                        | 0.239                                           |
|                                                                                 | 3      | 2.555(0.868-4.242)                           | 0.003**                              | 0.108                 | 0                            | 0.92                                            |
|                                                                                 | 4      | 2.62(0.911-4.328)                            | 0.003**                              | 0.111                 | 0.003                        | 0.575                                           |
| Resting heart rate (bpm)                                                        | 1      | -4.367(-8.915-0.181)                         | 0.06                                 | 0.036                 | 0.036                        | 0.06                                            |
|                                                                                 | 2      | -4.126(-8.693-0.441)                         | 0.076                                | 0.047                 | 0.011                        | 0.287                                           |
|                                                                                 | 3      | -3.064(-7.548-1.421)                         | 0.178                                | 0.117                 | 0.07                         | 0.007**                                         |
|                                                                                 | 4      | -2.67(-7.179-1.84)                           | 0.243                                | 0.133                 | 0.015                        | 0.196                                           |
| Systolic blood pressure                                                         | 1      | 6.495(-0.921-13.912)                         | 0.085                                | 0.03                  | 0.03                         | 0.085                                           |
|                                                                                 | 2      | 6.449(-1.042-13.939)                         | 0.091                                | 0.03                  | 0                            | 0.9                                             |
|                                                                                 | 3      | 5.424(-2.12-12.968)                          | 0.157                                | 0.055                 | 0.025                        | 0.116                                           |
|                                                                                 | 4      | 3.521(-3.558-10.601)                         | 0.326                                | 0.191                 | 0.136                        | <0.001***                                       |
| Diastolic blood pressure                                                        | 1      | -0.904(-4.679-2.87)                          | 0.635                                | 0.002                 | 0.002                        | 0.635                                           |
|                                                                                 | 2      | -0.646(-4.421-3.129)                         | 0.735                                | 0.022                 | 0.019                        | 0.168                                           |
|                                                                                 | 3      | 0.297(-3.387-3.981)                          | 0.873                                | 0.105                 | 0.083                        | 0.004**                                         |
|                                                                                 | 4      | 0.279(-3.459-4.016)                          | 0.883                                | 0.105                 | 0                            | 0.942                                           |
| Natural log-transformed delta FHS score                                         | 1      | 0.652(0.211-1.092)                           | 0.004**                              | 0.081                 | 0.081                        | 0.004**                                         |
|                                                                                 | 2      | 0.65(0.205-1.095)                            | 0.005**                              | 0.081                 | 0                            | 0.935                                           |
|                                                                                 | 3      | 0.443(0.062-0.825)                           | 0.023*                               | 0.351                 | 0.27                         | <0.001***                                       |
|                                                                                 | 4      | 0.275(-0.014-0.564)                          | 0.062                                | 0.638                 | 0.286                        | <0.001***                                       |

Footnotes: CP= cerebral palsy; MCI=mild cognitive impairment; hs-CRP=high-sensitivity C-reactive protein; BDNF=brain-derived neurotrophic factor; #Semantic fluency (60-second animal naming); WAIS= Wechsler Adult Intelligence Scale, BMI= Body-mass index; bpm= beats per minute; FHS=Framingham heart study; 95% CI=95% confidence interval. \* indicates <0.05, \*\* indicates <0.01, \*\*\* indicates <0.00. Model 1: no covariates, Model 2: added gender, Model 3: added years of formal education (in years), Model 4: added “CP VS MCI cohort”.

**Supplementary Table 2C. Associations of natural log-transformed delta FHS score with biomarker, neurocognitive, and anthropometric measures for CP cohort.**

| Dependent variable:<br>Biomarkers / Neurocognitive /<br>Anthropometric measures | Models | Independent variable: Natural log-transformed delta FHS score |                                      |                       |                              |                                                 |
|---------------------------------------------------------------------------------|--------|---------------------------------------------------------------|--------------------------------------|-----------------------|------------------------------|-------------------------------------------------|
|                                                                                 |        | $\beta$ (95% CI)                                              | <i>P</i> -value of regression models | <i>R</i> <sup>2</sup> | <i>R</i> <sup>2</sup> Change | <i>P</i> -value of <i>R</i> <sup>2</sup> Change |
| Log-transformed hs-CRP                                                          | 1      | 0.138(-0.431-0.706)                                           | 0.628                                | 0.006                 | 0.006                        | 0.628                                           |
|                                                                                 | 2      | 0.236(-0.358-0.83)                                            | 0.427                                | 0.035                 | 0.029                        | 0.268                                           |
|                                                                                 | 3      | 0.214(-0.395-0.823)                                           | 0.483                                | 0.039                 | 0.004                        | 0.667                                           |
|                                                                                 | 4      | 0.44(-0.241-1.121)                                            | 0.199                                | 0.086                 | 0.047                        | 0.16                                            |
| Log-transformed BDNF                                                            | 1      | 0.268(-0.171-0.706)                                           | 0.225                                | 0.034                 | 0.034                        | 0.225                                           |
|                                                                                 | 2      | 0.377(-0.074-0.828)                                           | 0.099                                | 0.092                 | 0.058                        | 0.108                                           |
|                                                                                 | 3      | 0.415(-0.043-0.873)                                           | 0.074                                | 0.113                 | 0.021                        | 0.334                                           |
|                                                                                 | 4      | 0.371(-0.154-0.895)                                           | 0.161                                | 0.116                 | 0.003                        | 0.715                                           |
| Semantic Fluency#                                                               | 1      | 4.009(-1.369-9.387)                                           | 0.14                                 | 0.05                  | 0.05                         | 0.14                                            |
|                                                                                 | 2      | 5.071(-0.526-10.667)                                          | 0.075                                | 0.086                 | 0.036                        | 0.207                                           |
|                                                                                 | 3      | 5.373(-0.355-11.1)                                            | 0.065                                | 0.094                 | 0.008                        | 0.539                                           |
|                                                                                 | 4      | 7.065(0.602-13.529)                                           | 0.033*                               | 0.122                 | 0.028                        | 0.265                                           |
| WAIS-V Block Design                                                             | 1      | -9.992(-22.683-2.699)                                         | 0.12                                 | 0.055                 | 0.055                        | 0.12                                            |
|                                                                                 | 2      | -7.946(-21.239-5.347)                                         | 0.234                                | 0.079                 | 0.024                        | 0.304                                           |
|                                                                                 | 3      | -6.675(-20.14-6.791)                                          | 0.323                                | 0.106                 | 0.027                        | 0.273                                           |
|                                                                                 | 4      | -7.544(-22.971-7.882)                                         | 0.329                                | 0.107                 | 0.001                        | 0.809                                           |
| BMI (kg/m <sup>2</sup> )                                                        | 1      | 1.711(-3.105-6.528)                                           | 0.478                                | 0.012                 | 0.012                        | 0.478                                           |
|                                                                                 | 2      | 2.685(-2.323-7.693)                                           | 0.285                                | 0.051                 | 0.039                        | 0.196                                           |
|                                                                                 | 3      | 3.033(-2.076-8.142)                                           | 0.237                                | 0.066                 | 0.015                        | 0.428                                           |
|                                                                                 | 4      | 2.521(-3.326-8.367)                                           | 0.389                                | 0.069                 | 0.003                        | 0.707                                           |
| Resting heart rate (bpm)                                                        | 1      | 2.6(-9.064-14.264)                                            | 0.655                                | 0.005                 | 0.005                        | 0.655                                           |
|                                                                                 | 2      | 4.517(-7.694-16.728)                                          | 0.46                                 | 0.031                 | 0.026                        | 0.294                                           |
|                                                                                 | 3      | 4.639(-7.913-17.191)                                          | 0.46                                 | 0.031                 | 0                            | 0.91                                            |
|                                                                                 | 4      | 3.81(-10.569-18.19)                                           | 0.595                                | 0.033                 | 0.001                        | 0.805                                           |
| Systolic blood pressure                                                         | 1      | -0.614(-12.474-11.246)                                        | 0.917                                | 0                     | 0                            | 0.917                                           |
|                                                                                 | 2      | 1.821(-10.502-14.143)                                         | 0.767                                | 0.041                 | 0.041                        | 0.189                                           |
|                                                                                 | 3      | 2.075(-10.586-14.736)                                         | 0.742                                | 0.042                 | 0.001                        | 0.814                                           |
|                                                                                 | 4      | 0.915(-13.579-15.408)                                         | 0.899                                | 0.045                 | 0.003                        | 0.731                                           |
| Diastolic blood pressure                                                        | 1      | 5.812(-0.681-12.305)                                          | 0.078                                | 0.07                  | 0.07                         | 0.078                                           |
|                                                                                 | 2      | 6.38(-0.482-13.243)                                           | 0.068                                | 0.077                 | 0.007                        | 0.579                                           |
|                                                                                 | 3      | 7.494(0.741-14.246)                                           | 0.03*                                | 0.155                 | 0.078                        | 0.059                                           |
|                                                                                 | 4      | 9.588(1.98-17.196)                                            | 0.015*                               | 0.184                 | 0.029                        | 0.241                                           |

Footnotes: CP= cerebral palsy; MCI=mild cognitive impairment; hs-CRP=high-sensitivity C-reactive protein; BDNF=brain-derived neurotrophic factor; #Semantic fluency (60-second animal naming); WAIS= Wechsler Adult Intelligence Scale, BMI= Body-mass index; bpm= beats per minute; FHS=Framingham heart study; 95% CI=95% confidence interval. \* indicates <0.05, \*\* indicates <0.01, \*\*\* indicates <0.001. Model 1: no covariates, Model 2: added gender, Model 3: added years of formal education (in years), Model 4: added chronological age (in years).

**Supplementary Table 2D. Associations of natural log-transformed delta FHS score with biomarker, neurocognitive, and anthropometric measures for MCI cohort.**

| Dependent variable:<br>Biomarkers / Neurocognitive /<br>Anthropometric measures | Models | Independent variable: Natural log-transformed delta FHS score |                                      |                       |                              |                                                 |
|---------------------------------------------------------------------------------|--------|---------------------------------------------------------------|--------------------------------------|-----------------------|------------------------------|-------------------------------------------------|
|                                                                                 |        | $\beta$ (95% CI)                                              | <i>P</i> -value of regression models | <i>R</i> <sup>2</sup> | <i>R</i> <sup>2</sup> Change | <i>P</i> -value of <i>R</i> <sup>2</sup> Change |
| Log-transformed hs-CRP                                                          | 1      | 0.073(-0.073-0.218)                                           | 0.321                                | 0.019                 | 0.019                        | 0.321                                           |
|                                                                                 | 2      | 0.069(-0.083-0.22)                                            | 0.368                                | 0.019                 | 0.001                        | 0.842                                           |
|                                                                                 | 3      | 0.07(-0.084-0.223)                                            | 0.367                                | 0.02                  | 0.001                        | 0.851                                           |
|                                                                                 | 4      | 0.071(-0.086-0.227)                                           | 0.368                                | 0.02                  | 0                            | 0.91                                            |
| Log-transformed BDNF                                                            | 1      | 0.193(-0.079-0.465)                                           | 0.161                                | 0.037                 | 0.037                        | 0.161                                           |
|                                                                                 | 2      | 0.236(-0.045-0.516)                                           | 0.098                                | 0.063                 | 0.026                        | 0.237                                           |
|                                                                                 | 3      | 0.244(-0.036-0.524)                                           | 0.086                                | 0.084                 | 0.021                        | 0.281                                           |
|                                                                                 | 4      | 0.262(-0.022-0.546)                                           | 0.07                                 | 0.099                 | 0.015                        | 0.365                                           |
| Semantic Fluency#                                                               | 1      | -0.795(-1.914-0.324)                                          | 0.16                                 | 0.037                 | 0.037                        | 0.16                                            |
|                                                                                 | 2      | -0.933(-2.093-0.227)                                          | 0.113                                | 0.053                 | 0.016                        | 0.356                                           |
|                                                                                 | 3      | -0.998(-2.126-0.129)                                          | 0.082                                | 0.125                 | 0.073                        | 0.045*                                          |
|                                                                                 | 4      | -0.908(-2.043-0.227)                                          | 0.115                                | 0.148                 | 0.023                        | 0.251                                           |
| WAIS-V Block Design                                                             | 1      | 0.974(-2.515-4.464)                                           | 0.578                                | 0.006                 | 0.006                        | 0.578                                           |
|                                                                                 | 2      | -0.367(-3.711-2.978)                                          | 0.827                                | 0.164                 | 0.158                        | 0.003**                                         |
|                                                                                 | 3      | -0.617(-3.761-2.526)                                          | 0.695                                | 0.279                 | 0.114                        | 0.006**                                         |
|                                                                                 | 4      | -0.137(-3.187-2.913)                                          | 0.929                                | 0.347                 | 0.069                        | 0.026*                                          |
| BMI (kg/m <sup>2</sup> )                                                        | 1      | 1.13(-0.251-2.511)                                            | 0.107                                | 0.048                 | 0.048                        | 0.107                                           |
|                                                                                 | 2      | 1.354(-0.069-2.776)                                           | 0.062                                | 0.075                 | 0.027                        | 0.225                                           |
|                                                                                 | 3      | 1.407(-0.008-2.822)                                           | 0.051                                | 0.107                 | 0.032                        | 0.184                                           |
|                                                                                 | 4      | 1.546(0.132-2.96)                                             | 0.033*                               | 0.142                 | 0.035                        | 0.158                                           |
| Resting heart rate (bpm)                                                        | 1      | -1.047(-4.826-2.731)                                          | 0.581                                | 0.006                 | 0.006                        | 0.581                                           |
|                                                                                 | 2      | -2.086(-5.87-1.698)                                           | 0.274                                | 0.087                 | 0.081                        | 0.037*                                          |
|                                                                                 | 3      | -2.139(-5.959-1.68)                                           | 0.266                                | 0.091                 | 0.004                        | 0.62                                            |
|                                                                                 | 4      | -1.833(-5.678-2.012)                                          | 0.343                                | 0.115                 | 0.024                        | 0.251                                           |
| Systolic blood pressure                                                         | 1      | 12.413(5.187-19.639)                                          | 0.001**                              | 0.183                 | 0.183                        | 0.001**                                         |
|                                                                                 | 2      | 11.414(3.941-18.886)                                          | 0.003**                              | 0.2                   | 0.017                        | 0.3                                             |
|                                                                                 | 3      | 11.202(3.715-18.69)                                           | 0.004**                              | 0.215                 | 0.016                        | 0.319                                           |
|                                                                                 | 4      | 10.77(3.184-18.356)                                           | 0.006**                              | 0.226                 | 0.011                        | 0.41                                            |
| Diastolic blood pressure                                                        | 1      | -0.11(-4.246-4.026)                                           | 0.958                                | 0                     | 0                            | 0.958                                           |
|                                                                                 | 2      | -0.722(-4.993-3.549)                                          | 0.736                                | 0.024                 | 0.024                        | 0.267                                           |
|                                                                                 | 3      | -0.846(-5.123-3.432)                                          | 0.693                                | 0.043                 | 0.02                         | 0.309                                           |
|                                                                                 | 4      | -0.13(-4.236-3.977)                                           | 0.95                                 | 0.153                 | 0.109                        | 0.014**                                         |

Footnotes: CP= cerebral palsy; MCI=mild cognitive impairment; hs-CRP=high-sensitivity C-reactive protein; BDNF=brain-derived neurotrophic factor; #Semantic fluency (60-second animal naming); WAIS= Wechsler Adult Intelligence Scale, BMI= Body-mass index; bpm= beats per minute; FHS=Framingham heart study; 95% CI=95% confidence interval. \* indicates <0.05, \*\* indicates <0.01, \*\*\* indicates <0.001. Model 1: no covariates, Model 2: added gender, Model 3: added years of formal education (in years), Model 4: added chronological age (in years).

**Supplementary Table 2E. Associations of BDNF with biomarker, neurocognitive, and anthropometric measures CP cohort.**

| Dependent variable:<br>Biomarkers / Neurocognitive /<br>Anthropometric measures | Models | Independent variable: Log-transformed BDNF |                                      |                       |                              |                                                 |
|---------------------------------------------------------------------------------|--------|--------------------------------------------|--------------------------------------|-----------------------|------------------------------|-------------------------------------------------|
|                                                                                 |        | $\beta$ (95% CI)                           | <i>P</i> -value of regression models | <i>R</i> <sup>2</sup> | <i>R</i> <sup>2</sup> Change | <i>P</i> -value of <i>R</i> <sup>2</sup> Change |
| Log-transformed hs-CRP                                                          | 1      | 0.434(0.065-0.804)                         | 0.022*                               | 0.116                 | 0.116                        | 0.022                                           |
|                                                                                 | 2      | 0.416(0.037-0.794)                         | 0.032*                               | 0.122                 | 0.007                        | 0.573                                           |
|                                                                                 | 3      | 0.431(0.049-0.813)                         | 0.028*                               | 0.137                 | 0.014                        | 0.416                                           |
|                                                                                 | 4      | 0.479(0.095-0.863)                         | 0.016*                               | 0.178                 | 0.041                        | 0.165                                           |
| Semantic Fluency#                                                               | 1      | 0.381(-3.421-4.184)                        | 0.841                                | 0.001                 | 0.001                        | 0.841                                           |
|                                                                                 | 2      | 0.139(-3.748-4.025)                        | 0.943                                | 0.013                 | 0.012                        | 0.476                                           |
|                                                                                 | 3      | 0.083(-3.869-4.036)                        | 0.966                                | 0.015                 | 0.002                        | 0.78                                            |
|                                                                                 | 4      | 0.124(-3.945-4.193)                        | 0.951                                | 0.015                 | 0                            | 0.91                                            |
| WAIS-V Block Design                                                             | 1      | -1.237(-10.232-7.758)                      | 0.783                                | 0.002                 | 0.002                        | 0.783                                           |
|                                                                                 | 2      | -2.426(-11.432-6.58)                       | 0.59                                 | 0.054                 | 0.052                        | 0.136                                           |
|                                                                                 | 3      | -3.032(-12.001-5.938)                      | 0.499                                | 0.094                 | 0.041                        | 0.183                                           |
|                                                                                 | 4      | -2.928(-12.161-6.306)                      | 0.525                                | 0.095                 | 0                            | 0.899                                           |
| BMI (kg/m <sup>2</sup> )                                                        | 1      | 3.15(-0.048-6.347)                         | 0.053                                | 0.084                 | 0.084                        | 0.053                                           |
|                                                                                 | 2      | 2.942(-0.325-6.21)                         | 0.076                                | 0.096                 | 0.011                        | 0.469                                           |
|                                                                                 | 3      | 2.87(-0.449-6.189)                         | 0.088                                | 0.1                   | 0.004                        | 0.665                                           |
|                                                                                 | 4      | 2.687(-0.714-6.089)                        | 0.118                                | 0.108                 | 0.008                        | 0.545                                           |
| Resting heart rate (bpm)                                                        | 1      | -2.952(-10.961-5.057)                      | 0.461                                | 0.013                 | 0.013                        | 0.461                                           |
|                                                                                 | 2      | -3.678(-11.814-4.457)                      | 0.367                                | 0.037                 | 0.024                        | 0.31                                            |
|                                                                                 | 3      | -3.71(-11.991-4.572)                       | 0.371                                | 0.037                 | 0                            | 0.939                                           |
|                                                                                 | 4      | -4.264(-12.732-4.205)                      | 0.315                                | 0.05                  | 0.013                        | 0.462                                           |
| Systolic blood pressure                                                         | 1      | 4.316(-3.754-12.386)                       | 0.287                                | 0.026                 | 0.026                        | 0.287                                           |
|                                                                                 | 2      | 3.504(-4.669-11.677)                       | 0.392                                | 0.056                 | 0.029                        | 0.259                                           |
|                                                                                 | 3      | 3.463(-4.856-11.782)                       | 0.405                                | 0.056                 | 0                            | 0.922                                           |
|                                                                                 | 4      | 3.223(-5.332-11.778)                       | 0.451                                | 0.058                 | 0.002                        | 0.751                                           |
| Diastolic blood pressure                                                        | 1      | 0.913(-3.721-5.548)                        | 0.693                                | 0.004                 | 0.004                        | 0.693                                           |
|                                                                                 | 2      | 0.942(-3.824-5.708)                        | 0.692                                | 0.004                 | 0                            | 0.945                                           |
|                                                                                 | 3      | 0.599(-4.132-5.33)                         | 0.8                                  | 0.053                 | 0.049                        | 0.153                                           |
|                                                                                 | 4      | 0.617(-4.254-5.488)                        | 0.799                                | 0.053                 | 0                            | 0.966                                           |
| Natural log-transformed delta FHS score                                         | 1      | 0.127(-0.081-0.336)                        | 0.225                                | 0.034                 | 0.034                        | 0.225                                           |
|                                                                                 | 2      | 0.169(-0.033-0.37)                         | 0.099                                | 0.147                 | 0.113                        | 0.023*                                          |
|                                                                                 | 3      | 0.182(-0.019-0.383)                        | 0.074                                | 0.183                 | 0.036                        | 0.188                                           |
|                                                                                 | 4      | 0.131(-0.054-0.316)                        | 0.161                                | 0.343                 | 0.16                         | 0.003**                                         |

Footnotes: CP= cerebral palsy; MCI=mild cognitive impairment; hs-CRP=high-sensitivity C-reactive protein; BDNF=brain-derived neurotrophic factor; #Semantic fluency (60-second animal naming); WAIS= Wechsler Adult Intelligence Scale, BMI= Body-mass index; bpm= beats per minute; FHS=Framingham heart study; 95% CI=95% confidence interval. \* indicates <0.05, \*\* indicates <0.01, \*\*\* indicates <0.001. Model 1: no covariates, Model 2: added gender, Model 3: added years of formal education (in years), Model 4: added chronological age (in years).

**Supplementary Table 2F. Associations of BDNF with biomarker, neurocognitive, and anthropometric measures MCI cohort.**

| Dependent variable:<br>Biomarkers / Neurocognitive /<br>Anthropometric measures | Models | Independent variable: Log-transformed BDNF |                                      |                       |                              |                                                 |
|---------------------------------------------------------------------------------|--------|--------------------------------------------|--------------------------------------|-----------------------|------------------------------|-------------------------------------------------|
|                                                                                 |        | $\beta$ (95% CI)                           | <i>P</i> -value of regression models | <i>R</i> <sup>2</sup> | <i>R</i> <sup>2</sup> Change | <i>P</i> -value of <i>R</i> <sup>2</sup> Change |
| Log-transformed hs-CRP                                                          | 1      | 0.07(-0.075-0.214)                         | 0.337                                | 0.017                 | 0.017                        | 0.337                                           |
|                                                                                 | 2      | 0.074(-0.072-0.221)                        | 0.314                                | 0.023                 | 0.006                        | 0.582                                           |
|                                                                                 | 3      | 0.074(-0.075-0.223)                        | 0.323                                | 0.023                 | 0                            | 0.997                                           |
|                                                                                 | 4      | 0.075(-0.077-0.226)                        | 0.326                                | 0.023                 | 0                            | 0.919                                           |
| Semantic Fluency#                                                               | 1      | -0.928(-2.033-0.177)                       | 0.098                                | 0.051                 | 0.051                        | 0.098                                           |
|                                                                                 | 2      | -0.907(-2.028-0.214)                       | 0.111                                | 0.053                 | 0.002                        | 0.72                                            |
|                                                                                 | 3      | -0.778(-1.889-0.332)                       | 0.166                                | 0.106                 | 0.053                        | 0.089                                           |
|                                                                                 | 4      | -0.854(-1.955-0.247)                       | 0.126                                | 0.146                 | 0.04                         | 0.132                                           |
| WAIS-V Block Design                                                             | 1      | -2.836(-6.228-0.556)                       | 0.099                                | 0.05                  | 0.05                         | 0.099                                           |
|                                                                                 | 2      | -2.321(-5.49-0.848)                        | 0.148                                | 0.197                 | 0.146                        | 0.003**                                         |
|                                                                                 | 3      | -1.781(-4.806-1.244)                       | 0.243                                | 0.296                 | 0.099                        | 0.01*                                           |
|                                                                                 | 4      | -2.107(-5.001-0.786)                       | 0.15                                 | 0.374                 | 0.079                        | 0.016                                           |
| BMI (kg/m <sup>2</sup> )                                                        | 1      | 1.058(-0.32-2.435)                         | 0.129                                | 0.043                 | 0.043                        | 0.129                                           |
|                                                                                 | 2      | 1.014(-0.38-2.408)                         | 0.15                                 | 0.049                 | 0.006                        | 0.555                                           |
|                                                                                 | 3      | 0.918(-0.489-2.325)                        | 0.196                                | 0.068                 | 0.019                        | 0.311                                           |
|                                                                                 | 4      | 0.855(-0.559-2.268)                        | 0.23                                 | 0.086                 | 0.018                        | 0.325                                           |
| Resting heart rate (bpm)                                                        | 1      | -2.128(-5.851-1.594)                       | 0.257                                | 0.024                 | 0.024                        | 0.257                                           |
|                                                                                 | 2      | -1.778(-5.445-1.89)                        | 0.335                                | 0.082                 | 0.058                        | 0.076                                           |
|                                                                                 | 3      | -1.701(-5.436-2.034)                       | 0.365                                | 0.084                 | 0.002                        | 0.76                                            |
|                                                                                 | 4      | -1.935(-5.653-1.783)                       | 0.301                                | 0.118                 | 0.034                        | 0.168                                           |
| Systolic blood pressure                                                         | 1      | 3.907(-3.97-11.784)                        | 0.324                                | 0.018                 | 0.018                        | 0.324                                           |
|                                                                                 | 2      | 4.679(-3.061-12.42)                        | 0.231                                | 0.081                 | 0.063                        | 0.065                                           |
|                                                                                 | 3      | 5.343(-2.424-13.11)                        | 0.173                                | 0.11                  | 0.029                        | 0.206                                           |
|                                                                                 | 4      | 5.798(-1.952-13.548)                       | 0.139                                | 0.139                 | 0.029                        | 0.199                                           |
| Diastolic blood pressure                                                        | 1      | 1.694(-2.393-5.781)                        | 0.409                                | 0.013                 | 0.013                        | 0.409                                           |
|                                                                                 | 2      | 1.948(-2.149-6.046)                        | 0.344                                | 0.038                 | 0.025                        | 0.246                                           |
|                                                                                 | 3      | 2.266(-1.857-6.39)                         | 0.275                                | 0.063                 | 0.025                        | 0.254                                           |
|                                                                                 | 4      | 1.821(-2.123-5.765)                        | 0.358                                | 0.167                 | 0.104                        | 0.016*                                          |
| Natural log-transformed delta FHS score                                         | 1      | 0.191(-0.078-0.46)                         | 0.161                                | 0.037                 | 0.037                        | 0.161                                           |
|                                                                                 | 2      | 0.22(-0.042-0.482)                         | 0.098                                | 0.114                 | 0.078                        | 0.038*                                          |
|                                                                                 | 3      | 0.232(-0.034-0.497)                        | 0.086                                | 0.121                 | 0.007                        | 0.522                                           |
|                                                                                 | 4      | 0.246(-0.02-0.512)                         | 0.07                                 | 0.145                 | 0.024                        | 0.243                                           |

Footnotes: CP= cerebral palsy; MCI=mild cognitive impairment; hs-CRP=high-sensitivity C-reactive protein; BDNF=brain-derived neurotrophic factor; #Semantic fluency (60-second animal naming); WAIS= Wechsler Adult Intelligence Scale, BMI= Body-mass index; bpm= beats per minute; FHS=Framingham heart study; 95% CI=95% confidence interval. \* indicates <0.05, \*\* indicates <0.01, \*\*\* indicates <0.001. Model 1: no covariates, Model 2: added gender, Model 3: added years of formal education (in years), Model 4: added chronological age (in years).

**Supplementary Table 3A. Shared and distinct biomarkers, neurocognitive, and anthropometric measures between adults with CP and MCI.**

| Dependent variable:<br>Biomarkers / Neurocognitive /<br>Anthropometric measures | Models | Independent variable: CP versus MCI cohorts |                              |                |                       |                                  |
|---------------------------------------------------------------------------------|--------|---------------------------------------------|------------------------------|----------------|-----------------------|----------------------------------|
|                                                                                 |        | $\beta$ (95% CI)                            | P-value of regression models | R <sup>2</sup> | R <sup>2</sup> Change | P-value of R <sup>2</sup> Change |
| Log-transformed hs-CRP                                                          | 1      | 0.095(-0.136-0.326)                         | 0.414                        | 0.009          | 0.009                 | 0.414                            |
|                                                                                 | 2      | 0.1(-0.136-0.336)                           | 0.4                          | 0.01           | 0.001                 | 0.804                            |
|                                                                                 | 3      | 0.079(-0.257-0.415)                         | 0.64                         | 0.011          | 0                     | 0.86                             |
| Log-transformed BDNF                                                            | 1      | 4.264(3.643-4.884)                          | <0.001***                    | 0.726          | 0.726                 | <0.001***                        |
|                                                                                 | 2      | 4.294(3.66-4.928)                           | <0.001***                    | 0.727          | 0.001                 | 0.593                            |
|                                                                                 | 3      | 4.135(3.235-5.036)                          | <0.001***                    | 0.728          | 0.001                 | 0.62                             |
| Semantic Fluency#                                                               | 1      | -9.381(-11.288--7.474)                      | <0.001***                    | 0.575          | 0.575                 | <0.001***                        |
|                                                                                 | 2      | -9.31(-11.26--7.36)                         | <0.001***                    | 0.576          | 0.001                 | 0.686                            |
|                                                                                 | 3      | -7.92(-10.654--5.185)                       | <0.001***                    | 0.589          | 0.012                 | 0.156                            |
| WAIS-V Block Design                                                             | 1      | -18.187(-24.309--12.064)                    | <0.001***                    | 0.331          | 0.331                 | <0.001***                        |
|                                                                                 | 2      | -17.747(-23.987--11.506)                    | <0.001***                    | 0.337          | 0.006                 | 0.433                            |
|                                                                                 | 3      | -7.974(-16.211-0.263)                       | 0.058                        | 0.429          | 0.093                 | 0.001**                          |
| BMI (kg/m <sup>2</sup> )                                                        | 1      | 0.865(-1.033-2.763)                         | 0.367                        | 0.011          | 0.011                 | 0.367                            |
|                                                                                 | 2      | 0.794(-1.147-2.736)                         | 0.417                        | 0.014          | 0.002                 | 0.687                            |
|                                                                                 | 3      | -0.466(-3.195-2.263)                        | 0.734                        | 0.038          | 0.024                 | 0.196                            |
| Resting heart rate (bpm)                                                        | 1      | -6.015(-11.401--0.63)                       | 0.029*                       | 0.065          | 0.065                 | 0.029*                           |
|                                                                                 | 2      | -5.493(-10.963--0.024)                      | 0.049                        | 0.08           | 0.015                 | 0.29                             |
|                                                                                 | 3      | -2.434(-10.148-5.281)                       | 0.531                        | 0.097          | 0.016                 | 0.267                            |
| Systolic blood pressure                                                         | 1      | 12.975(2.552-23.397)                        | 0.015*                       | 0.08           | 0.08                  | 0.015*                           |
|                                                                                 | 2      | 14.049(3.475-24.622)                        | 0.01*                        | 0.097          | 0.017                 | 0.26                             |
|                                                                                 | 3      | 23.18(8.455-37.906)                         | 0.002**                      | 0.135          | 0.038                 | 0.084                            |
| Diastolic blood pressure                                                        | 1      | -5.31(-10.884-0.264)                        | 0.062                        | 0.048          | 0.048                 | 0.062                            |
|                                                                                 | 2      | -5.112(-10.813-0.588)                       | 0.078                        | 0.05           | 0.002                 | 0.699                            |
|                                                                                 | 3      | -1.667(-9.695-6.362)                        | 0.68                         | 0.07           | 0.02                  | 0.23                             |
| Natural log-transformed delta FHS score                                         | 1      | 1.893(1.504-2.283)                          | <0.001***                    | 0.569          | 0.569                 | <0.001***                        |
|                                                                                 | 2      | 1.972(1.587-2.357)                          | <0.001***                    | 0.599          | 0.03                  | 0.025**                          |
|                                                                                 | 3      | 2.147(1.603-2.691)                          | <0.001***                    | 0.604          | 0.005                 | 0.367                            |

Footnotes: CP= cerebral palsy; MCI=mild cognitive impairment; hs-CRP=high-sensitivity C-reactive protein; BDNF=brain-derived neurotrophic factor; #Semantic fluency (60-second animal naming); WAIS= Wechsler Adult Intelligence Scale; BMI= Body-mass index; bpm= beats per minute; FHS=Framingham heart study; 95% CI=95% confidence interval. \* indicates <0.05, \*\* indicates <0.01, \*\*\* indicates <0.001. Model 1: no covariates, Model 2: added gender, Model 3: added years of formal education (in years).

**Supplementary Table 3B. Associations of hs-CRP with biomarker, neurocognitive, and anthropometric measures.**

| Dependent variable:<br>Biomarkers / Neurocognitive /<br>Anthropometric measures | Models | Independent variable: Log-transformed hs-CRP |                                      |                       |                              |                                                 |
|---------------------------------------------------------------------------------|--------|----------------------------------------------|--------------------------------------|-----------------------|------------------------------|-------------------------------------------------|
|                                                                                 |        | $\beta$ (95% CI)                             | <i>P</i> -value of regression models | <i>R</i> <sup>2</sup> | <i>R</i> <sup>2</sup> Change | <i>P</i> -value of <i>R</i> <sup>2</sup> Change |
| Log-transformed BDNF                                                            | 1      | 0.638(-0.562-1.838)                          | 0.293                                | 0.016                 | 0.016                        | 0.293                                           |
|                                                                                 | 2      | 0.645(-0.554-1.845)                          | 0.287                                | 0.03                  | 0.014                        | 0.31                                            |
|                                                                                 | 3      | 0.376(-0.577-1.328)                          | 0.434                                | 0.402                 | 0.372                        | <0.001***                                       |
|                                                                                 | 4      | 0.21(-0.437-0.856)                           | 0.52                                 | 0.729                 | 0.327                        | <0.001***                                       |
| Semantic Fluency#                                                               | 1      | -1.909(-4.862-1.043)                         | 0.201                                | 0.023                 | 0.023                        | 0.201                                           |
|                                                                                 | 2      | -1.934(-4.865-0.997)                         | 0.192                                | 0.051                 | 0.028                        | 0.153                                           |
|                                                                                 | 3      | -1.29(-3.646-1.067)                          | 0.279                                | 0.4                   | 0.349                        | <0.001***                                       |
|                                                                                 | 4      | -0.973(-2.929-0.982)                         | 0.324                                | 0.595                 | 0.194                        | <0.001***                                       |
| WAIS-V Block Design                                                             | 1      | -3.795(-11.381-3.791)                        | 0.322                                | 0.014                 | 0.014                        | 0.322                                           |
|                                                                                 | 2      | -3.863(-11.379-3.653)                        | 0.309                                | 0.046                 | 0.032                        | 0.129                                           |
|                                                                                 | 3      | -2.195(-8.207-3.817)                         | 0.469                                | 0.403                 | 0.357                        | <0.001***                                       |
|                                                                                 | 4      | -1.88(-7.794-4.035)                          | 0.528                                | 0.433                 | 0.03                         | 0.064                                           |
| BMI (kg/m <sup>2</sup> )                                                        | 1      | 2.334(0.465-4.203)                           | 0.015*                               | 0.08                  | 0.08                         | 0.015*                                          |
|                                                                                 | 2      | 2.341(0.463-4.218)                           | 0.015*                               | 0.085                 | 0.005                        | 0.544                                           |
|                                                                                 | 3      | 2.231(0.357-4.106)                           | 0.02*                                | 0.109                 | 0.024                        | 0.181                                           |
|                                                                                 | 4      | 2.257(0.369-4.145)                           | 0.02*                                | 0.112                 | 0.003                        | 0.628                                           |
| Resting heart rate (bpm)                                                        | 1      | -1.719(-7.39-3.953)                          | 0.548                                | 0.005                 | 0.005                        | 0.548                                           |
|                                                                                 | 2      | -1.766(-7.399-3.868)                         | 0.534                                | 0.033                 | 0.028                        | 0.16                                            |
|                                                                                 | 3      | -1.252(-6.765-4.262)                         | 0.652                                | 0.094                 | 0.061                        | 0.034*                                          |
|                                                                                 | 4      | -1.157(-6.706-4.392)                         | 0.679                                | 0.099                 | 0.005                        | 0.55                                            |
| Systolic blood pressure                                                         | 1      | 9.816(-1.029-20.66)                          | 0.075                                | 0.044                 | 0.044                        | 0.075                                           |
|                                                                                 | 2      | 9.775(-1.119-20.669)                         | 0.078                                | 0.049                 | 0.005                        | 0.527                                           |
|                                                                                 | 3      | 9.547(-1.451-20.546)                         | 0.088                                | 0.053                 | 0.003                        | 0.634                                           |
|                                                                                 | 4      | 8.64(-1.757-19.038)                          | 0.102                                | 0.169                 | 0.116                        | 0.003**                                         |
| Diastolic blood pressure                                                        | 1      | 2.236(-3.572-8.044)                          | 0.445                                | 0.008                 | 0.008                        | 0.445                                           |
|                                                                                 | 2      | 2.212(-3.619-8.043)                          | 0.452                                | 0.015                 | 0.007                        | 0.488                                           |
|                                                                                 | 3      | 2.756(-2.942-8.454)                          | 0.338                                | 0.08                  | 0.065                        | 0.03*                                           |
|                                                                                 | 4      | 2.833(-2.909-8.574)                          | 0.328                                | 0.083                 | 0.003                        | 0.641                                           |
| Natural log-transformed delta FHS score                                         | 1      | 0.476(-0.12-1.071)                           | 0.116                                | 0.035                 | 0.035                        | 0.116                                           |
|                                                                                 | 2      | 0.475(-0.125-1.074)                          | 0.119                                | 0.036                 | 0.001                        | 0.776                                           |
|                                                                                 | 3      | 0.368(-0.16-0.895)                           | 0.169                                | 0.269                 | 0.234                        | <0.001***                                       |
|                                                                                 | 4      | 0.282(-0.104-0.668)                          | 0.15                                 | 0.616                 | 0.347                        | <0.001***                                       |

Footnotes: CP= cerebral palsy; MCI=mild cognitive impairment; hs-CRP=high-sensitivity C-reactive protein; BDNF=brain-derived neurotrophic factor; #Semantic fluency (60-second animal naming); WAIS= Wechsler Adult Intelligence Scale, BMI= Body-mass index; bpm= beats per minute; FHS=Framingham heart study; 95% CI=95% confidence interval. \* indicates <0.05, \*\* indicates <0.01, \*\*\* indicates <0.00. Model 1: no covariates, Model 2: added gender, Model 3: added years of formal education (in years), Model 4: added “CP VS MCI cohort”.

**Supplementary Table 3C. Associations of natural log-transformed delta FHS score with biomarker, neurocognitive, and anthropometric measures for CP cohort.**

| Dependent variable:<br>Biomarkers / Neurocognitive /<br>Anthropometric measures | Models | Independent variable: Natural log-transformed delta FHS score |                                      |                       |                              |                                                 |
|---------------------------------------------------------------------------------|--------|---------------------------------------------------------------|--------------------------------------|-----------------------|------------------------------|-------------------------------------------------|
|                                                                                 |        | $\beta$ (95% CI)                                              | <i>P</i> -value of regression models | <i>R</i> <sup>2</sup> | <i>R</i> <sup>2</sup> Change | <i>P</i> -value of <i>R</i> <sup>2</sup> Change |
| Log-transformed hs-CRP                                                          | 1      | 0.023(-0.829-0.875)                                           | 0.955                                | 0                     | 0                            | 0.955                                           |
|                                                                                 | 2      | 0.055(-0.884-0.993)                                           | 0.903                                | 0.003                 | 0.003                        | 0.834                                           |
|                                                                                 | 3      | 0.076(-0.904-1.056)                                           | 0.87                                 | 0.013                 | 0.01                         | 0.716                                           |
|                                                                                 | 4      | 0.124(-0.975-1.223)                                           | 0.811                                | 0.018                 | 0.005                        | 0.802                                           |
| Log-transformed BDNF                                                            | 1      | 0.341(-0.496-1.178)                                           | 0.401                                | 0.045                 | 0.045                        | 0.401                                           |
|                                                                                 | 2      | 0.514(-0.365-1.393)                                           | 0.232                                | 0.134                 | 0.089                        | 0.233                                           |
|                                                                                 | 3      | 0.463(-0.43-1.355)                                            | 0.285                                | 0.19                  | 0.056                        | 0.343                                           |
|                                                                                 | 4      | 0.29(-0.673-1.253)                                            | 0.527                                | 0.254                 | 0.064                        | 0.31                                            |
| Semantic Fluency#                                                               | 1      | -0.07(-7.734-7.594)                                           | 0.985                                | 0                     | 0                            | 0.985                                           |
|                                                                                 | 2      | -0.137(-8.59-8.315)                                           | 0.973                                | 0                     | 0                            | 0.961                                           |
|                                                                                 | 3      | 0.109(-8.691-8.909)                                           | 0.979                                | 0.017                 | 0.016                        | 0.637                                           |
|                                                                                 | 4      | 1.765(-7.752-11.281)                                          | 0.695                                | 0.09                  | 0.073                        | 0.325                                           |
| WAIS-V Block Design                                                             | 1      | -4.137(-29.895-21.62)                                         | 0.738                                | 0.007                 | 0.007                        | 0.738                                           |
|                                                                                 | 2      | 2.267(-24.15-28.684)                                          | 0.857                                | 0.142                 | 0.134                        | 0.146                                           |
|                                                                                 | 3      | 0.964(-26.111-28.039)                                         | 0.94                                 | 0.182                 | 0.04                         | 0.421                                           |
|                                                                                 | 4      | -2.91(-32.681-26.861)                                         | 0.836                                | 0.217                 | 0.035                        | 0.458                                           |
| BMI (kg/m <sup>2</sup> )                                                        | 1      | -2.027(-6.317-2.264)                                          | 0.332                                | 0.059                 | 0.059                        | 0.332                                           |
|                                                                                 | 2      | -2.704(-7.306-1.897)                                          | 0.23                                 | 0.11                  | 0.051                        | 0.367                                           |
|                                                                                 | 3      | -2.804(-7.613-2.005)                                          | 0.232                                | 0.118                 | 0.008                        | 0.727                                           |
|                                                                                 | 4      | -2.432(-7.803-2.939)                                          | 0.346                                | 0.129                 | 0.011                        | 0.69                                            |
| Resting heart rate (bpm)                                                        | 1      | -0.553(-16.364-15.259)                                        | 0.942                                | 0                     | 0                            | 0.942                                           |
|                                                                                 | 2      | 2.097(-14.797-18.992)                                         | 0.795                                | 0.062                 | 0.062                        | 0.337                                           |
|                                                                                 | 3      | 1.344(-16.048-18.737)                                         | 0.871                                | 0.098                 | 0.036                        | 0.468                                           |
|                                                                                 | 4      | 5.608(-12.665-23.881)                                         | 0.519                                | 0.212                 | 0.114                        | 0.194                                           |
| Systolic blood pressure                                                         | 1      | -2.695(-22.293-16.902)                                        | 0.774                                | 0.005                 | 0.005                        | 0.774                                           |
|                                                                                 | 2      | 0.692(-20.205-21.588)                                         | 0.945                                | 0.07                  | 0.065                        | 0.322                                           |
|                                                                                 | 3      | -0.053(-21.72-21.614)                                         | 0.996                                | 0.093                 | 0.023                        | 0.563                                           |
|                                                                                 | 4      | 0.74(-23.579-25.06)                                           | 0.949                                | 0.096                 | 0.003                        | 0.851                                           |
| Diastolic blood pressure                                                        | 1      | -2.092(-15.305-11.12)                                         | 0.741                                | 0.007                 | 0.007                        | 0.741                                           |
|                                                                                 | 2      | 0.766(-13.039-14.572)                                         | 0.907                                | 0.109                 | 0.102                        | 0.21                                            |
|                                                                                 | 3      | 1.637(-12.29-15.564)                                          | 0.805                                | 0.177                 | 0.068                        | 0.3                                             |
|                                                                                 | 4      | 5.194(-9.348-19.736)                                          | 0.454                                | 0.29                  | 0.113                        | 0.174                                           |

Footnotes: CP= cerebral palsy; MCI=mild cognitive impairment; hs-CRP=high-sensitivity C-reactive protein; BDNF=brain-derived neurotrophic factor; #Semantic fluency (60-second animal naming); WAIS= Wechsler Adult Intelligence Scale, BMI= Body-mass index; bpm= beats per minute; FHS=Framingham heart study; 95% CI=95% confidence interval. \* indicates <0.05, \*\* indicates <0.01, \*\*\* indicates <0.001. Model 1: no covariates, Model 2: added gender, Model 3: added years of formal education (in years), Model 4: added chronological age (in years).

**Supplementary Table 3D. Associations of natural log-transformed delta FHS score with biomarker, neurocognitive, and anthropometric measures for MCI cohort.**

| Dependent variable:<br>Biomarkers / Neurocognitive /<br>Anthropometric measures | Models | Independent variable: Natural log-transformed delta FHS score |                                      |                       |                              |                                                 |
|---------------------------------------------------------------------------------|--------|---------------------------------------------------------------|--------------------------------------|-----------------------|------------------------------|-------------------------------------------------|
|                                                                                 |        | $\beta$ (95% CI)                                              | <i>P</i> -value of regression models | <i>R</i> <sup>2</sup> | <i>R</i> <sup>2</sup> Change | <i>P</i> -value of <i>R</i> <sup>2</sup> Change |
| Log-transformed hs-CRP                                                          | 1      | 0.073(-0.073-0.218)                                           | 0.321                                | 0.019                 | 0.019                        | 0.321                                           |
|                                                                                 | 2      | 0.069(-0.083-0.22)                                            | 0.368                                | 0.019                 | 0.001                        | 0.842                                           |
|                                                                                 | 3      | 0.07(-0.084-0.223)                                            | 0.367                                | 0.02                  | 0.001                        | 0.851                                           |
|                                                                                 | 4      | 0.071(-0.086-0.227)                                           | 0.368                                | 0.02                  | 0                            | 0.91                                            |
| Log-transformed BDNF                                                            | 1      | 0.193(-0.079-0.465)                                           | 0.161                                | 0.037                 | 0.037                        | 0.161                                           |
|                                                                                 | 2      | 0.236(-0.045-0.516)                                           | 0.098                                | 0.063                 | 0.026                        | 0.237                                           |
|                                                                                 | 3      | 0.244(-0.036-0.524)                                           | 0.086                                | 0.084                 | 0.021                        | 0.281                                           |
|                                                                                 | 4      | 0.262(-0.022-0.546)                                           | 0.07                                 | 0.099                 | 0.015                        | 0.365                                           |
| Semantic Fluency#                                                               | 1      | -0.795(-1.914-0.324)                                          | 0.16                                 | 0.037                 | 0.037                        | 0.16                                            |
|                                                                                 | 2      | -0.933(-2.093-0.227)                                          | 0.113                                | 0.053                 | 0.016                        | 0.356                                           |
|                                                                                 | 3      | -0.998(-2.126-0.129)                                          | 0.082                                | 0.125                 | 0.073                        | 0.045*                                          |
|                                                                                 | 4      | -0.908(-2.043-0.227)                                          | 0.115                                | 0.148                 | 0.023                        | 0.251                                           |
| WAIS-V Block Design                                                             | 1      | 0.974(-2.515-4.464)                                           | 0.578                                | 0.006                 | 0.006                        | 0.578                                           |
|                                                                                 | 2      | -0.367(-3.711-2.978)                                          | 0.827                                | 0.164                 | 0.158                        | 0.003**                                         |
|                                                                                 | 3      | -0.617(-3.761-2.526)                                          | 0.695                                | 0.279                 | 0.114                        | 0.006**                                         |
|                                                                                 | 4      | -0.137(-3.187-2.913)                                          | 0.929                                | 0.347                 | 0.069                        | 0.026*                                          |
| BMI (kg/m <sup>2</sup> )                                                        | 1      | 1.13(-0.251-2.511)                                            | 0.107                                | 0.048                 | 0.048                        | 0.107                                           |
|                                                                                 | 2      | 1.354(-0.069-2.776)                                           | 0.062                                | 0.075                 | 0.027                        | 0.225                                           |
|                                                                                 | 3      | 1.407(-0.008-2.822)                                           | 0.051                                | 0.107                 | 0.032                        | 0.184                                           |
|                                                                                 | 4      | 1.546(0.132-2.96)                                             | 0.033*                               | 0.142                 | 0.035                        | 0.158                                           |
| Resting heart rate (bpm)                                                        | 1      | -1.047(-4.826-2.731)                                          | 0.581                                | 0.006                 | 0.006                        | 0.581                                           |
|                                                                                 | 2      | -2.086(-5.87-1.698)                                           | 0.274                                | 0.087                 | 0.081                        | 0.037*                                          |
|                                                                                 | 3      | -2.139(-5.959-1.68)                                           | 0.266                                | 0.091                 | 0.004                        | 0.62                                            |
|                                                                                 | 4      | -1.833(-5.678-2.012)                                          | 0.343                                | 0.115                 | 0.024                        | 0.251                                           |
| Systolic blood pressure                                                         | 1      | 12.413(5.187-19.639)                                          | 0.001**                              | 0.183                 | 0.183                        | 0.001**                                         |
|                                                                                 | 2      | 11.414(3.941-18.886)                                          | 0.003**                              | 0.2                   | 0.017                        | 0.3                                             |
|                                                                                 | 3      | 11.202(3.715-18.69)                                           | 0.004**                              | 0.215                 | 0.016                        | 0.319                                           |
|                                                                                 | 4      | 10.77(3.184-18.356)                                           | 0.006**                              | 0.226                 | 0.011                        | 0.41                                            |
| Diastolic blood pressure                                                        | 1      | -0.11(-4.246-4.026)                                           | 0.958                                | 0                     | 0                            | 0.958                                           |
|                                                                                 | 2      | -0.722(-4.993-3.549)                                          | 0.736                                | 0.024                 | 0.024                        | 0.267                                           |
|                                                                                 | 3      | -0.846(-5.123-3.432)                                          | 0.693                                | 0.043                 | 0.02                         | 0.309                                           |
|                                                                                 | 4      | -0.13(-4.236-3.977)                                           | 0.95                                 | 0.153                 | 0.109                        | 0.014*                                          |

Footnotes: CP= cerebral palsy; MCI=mild cognitive impairment; hs-CRP=high-sensitivity C-reactive protein; BDNF=brain-derived neurotrophic factor; #Semantic fluency (60-second animal naming); WAIS= Wechsler Adult Intelligence Scale, BMI= Body-mass index; bpm= beats per minute; FHS=Framingham heart study; 95% CI=95% confidence interval. \* indicates <0.05, \*\* indicates <0.01, \*\*\* indicates <0.001. Model 1: no covariates, Model 2: added gender, Model 3: added years of formal education (in years), Model 4: added chronological age (in years).

**Supplementary Table 3E. Associations of BDNF with biomarker, neurocognitive, and anthropometric measures CP cohort.**

| Dependent variable:<br>Biomarkers / Neurocognitive /<br>Anthropometric measures | Models | Independent variable: Log-transformed BDNF |                                      |                       |                              |                                                 |
|---------------------------------------------------------------------------------|--------|--------------------------------------------|--------------------------------------|-----------------------|------------------------------|-------------------------------------------------|
|                                                                                 |        | $\beta$ (95% CI)                           | <i>P</i> -value of regression models | <i>R</i> <sup>2</sup> | <i>R</i> <sup>2</sup> Change | <i>P</i> -value of <i>R</i> <sup>2</sup> Change |
| Log-transformed hs-CRP                                                          | 1      | 0.146(-0.376-0.668)                        | 0.561                                | 0.022                 | 0.022                        | 0.561                                           |
|                                                                                 | 2      | 0.143(-0.412-0.697)                        | 0.592                                | 0.022                 | 0                            | 0.95                                            |
|                                                                                 | 3      | 0.183(-0.412-0.778)                        | 0.52                                 | 0.041                 | 0.019                        | 0.606                                           |
|                                                                                 | 4      | 0.231(-0.429-0.891)                        | 0.464                                | 0.055                 | 0.014                        | 0.668                                           |
| Semantic Fluency#                                                               | 1      | -2.477(-7.035-2.081)                       | 0.266                                | 0.077                 | 0.077                        | 0.266                                           |
|                                                                                 | 2      | -2.57(-7.405-2.264)                        | 0.275                                | 0.079                 | 0.002                        | 0.847                                           |
|                                                                                 | 3      | -2.432(-7.667-2.803)                       | 0.336                                | 0.082                 | 0.003                        | 0.842                                           |
|                                                                                 | 4      | -1.819(-7.581-3.943)                       | 0.507                                | 0.11                  | 0.029                        | 0.529                                           |
| WAIS-V Block Design                                                             | 1      | 5.312(-10.437-21.062)                      | 0.485                                | 0.031                 | 0.031                        | 0.485                                           |
|                                                                                 | 2      | 3.078(-12.592-18.748)                      | 0.681                                | 0.15                  | 0.119                        | 0.168                                           |
|                                                                                 | 3      | 1.436(-15.214-18.087)                      | 0.856                                | 0.183                 | 0.034                        | 0.459                                           |
|                                                                                 | 4      | -0.726(-18.985-17.533)                     | 0.933                                | 0.215                 | 0.031                        | 0.484                                           |
| BMI (kg/m <sup>2</sup> )                                                        | 1      | 1.097(-1.578-3.772)                        | 0.397                                | 0.045                 | 0.045                        | 0.397                                           |
|                                                                                 | 2      | 1.297(-1.495-4.09)                         | 0.338                                | 0.078                 | 0.032                        | 0.479                                           |
|                                                                                 | 3      | 1.325(-1.703-4.352)                        | 0.364                                | 0.078                 | 0                            | 0.945                                           |
|                                                                                 | 4      | 1.994(-1.199-5.186)                        | 0.2                                  | 0.18                  | 0.102                        | 0.225                                           |
| Resting heart rate (bpm)                                                        | 1      | -10.034(-18.251--1.818)                    | 0.02*                                | 0.295                 | 0.295                        | 0.02*                                           |
|                                                                                 | 2      | -11.47(-19.344--3.596)                     | 0.007**                              | 0.426                 | 0.131                        | 0.084                                           |
|                                                                                 | 3      | -13.547(-20.933--6.161)                    | 0.001**                              | 0.571                 | 0.144                        | 0.048*                                          |
|                                                                                 | 4      | -13.118(-21.346--4.89)                     | 0.004**                              | 0.574                 | 0.003                        | 0.756                                           |
| Systolic blood pressure                                                         | 1      | 6.949(-4.642-18.539)                       | 0.222                                | 0.092                 | 0.092                        | 0.222                                           |
|                                                                                 | 2      | 5.935(-6.085-17.955)                       | 0.309                                | 0.134                 | 0.042                        | 0.405                                           |
|                                                                                 | 3      | 5.359(-7.62-18.338)                        | 0.391                                | 0.141                 | 0.007                        | 0.737                                           |
|                                                                                 | 4      | 6.606(-7.756-20.967)                       | 0.339                                | 0.159                 | 0.018                        | 0.607                                           |
| Diastolic blood pressure                                                        | 1      | 1.361(-6.813-9.536)                        | 0.729                                | 0.008                 | 0.008                        | 0.729                                           |
|                                                                                 | 2      | 0.306(-7.924-8.536)                        | 0.938                                | 0.108                 | 0.101                        | 0.213                                           |
|                                                                                 | 3      | 1.551(-6.996-10.097)                       | 0.703                                | 0.182                 | 0.074                        | 0.28                                            |
|                                                                                 | 4      | 3.719(-5.112-12.549)                       | 0.38                                 | 0.302                 | 0.12                         | 0.159                                           |
| Natural log-transformed delta FHS score                                         | 1      | 0.131(-0.19-0.451)                         | 0.401                                | 0.045                 | 0.045                        | 0.401                                           |
|                                                                                 | 2      | 0.182(-0.13-0.495)                         | 0.232                                | 0.197                 | 0.152                        | 0.113                                           |
|                                                                                 | 3      | 0.175(-0.163-0.514)                        | 0.285                                | 0.198                 | 0.001                        | 0.874                                           |
|                                                                                 | 4      | 0.109(-0.252-0.47)                         | 0.527                                | 0.269                 | 0.071                        | 0.282                                           |

Footnotes: CP= cerebral palsy; MCI=mild cognitive impairment; hs-CRP=high-sensitivity C-reactive protein; BDNF=brain-derived neurotrophic factor; #Semantic fluency (60-second animal naming); WAIS= Wechsler Adult Intelligence Scale, BMI= Body-mass index; bpm= beats per minute; FHS=Framingham heart study; 95% CI=95% confidence interval. \* indicates <0.05, \*\* indicates <0.01, \*\*\* indicates <0.001. Model 1: no covariates, Model 2: added gender, Model 3: added years of formal education (in years), Model 4: added chronological age (in years).

**Supplementary Table 3F. Associations of BDNF with biomarker, neurocognitive, and anthropometric measures MCI cohort.**

| Dependent variable:<br>Biomarkers / Neurocognitive /<br>Anthropometric measures | Models | Independent variable: Log-transformed BDNF |                                      |                       |                              |                                                 |
|---------------------------------------------------------------------------------|--------|--------------------------------------------|--------------------------------------|-----------------------|------------------------------|-------------------------------------------------|
|                                                                                 |        | $\beta$ (95% CI)                           | <i>P</i> -value of regression models | <i>R</i> <sup>2</sup> | <i>R</i> <sup>2</sup> Change | <i>P</i> -value of <i>R</i> <sup>2</sup> Change |
| Log-transformed hs-CRP                                                          | 1      | 0.07(-0.075-0.214)                         | 0.337                                | 0.017                 | 0.017                        | 0.337                                           |
|                                                                                 | 2      | 0.074(-0.072-0.221)                        | 0.314                                | 0.023                 | 0.006                        | 0.582                                           |
|                                                                                 | 3      | 0.074(-0.075-0.223)                        | 0.323                                | 0.023                 | 0                            | 0.997                                           |
|                                                                                 | 4      | 0.075(-0.077-0.226)                        | 0.326                                | 0.023                 | 0                            | 0.919                                           |
| Semantic Fluency#                                                               | 1      | -0.928(-2.033-0.177)                       | 0.098                                | 0.051                 | 0.051                        | 0.098                                           |
|                                                                                 | 2      | -0.907(-2.028-0.214)                       | 0.111                                | 0.053                 | 0.002                        | 0.72                                            |
|                                                                                 | 3      | -0.778(-1.889-0.332)                       | 0.166                                | 0.106                 | 0.053                        | 0.089                                           |
|                                                                                 | 4      | -0.854(-1.955-0.247)                       | 0.126                                | 0.146                 | 0.04                         | 0.132                                           |
| WAIS-V Block Design                                                             | 1      | -2.836(-6.228-0.556)                       | 0.099                                | 0.05                  | 0.05                         | 0.099                                           |
|                                                                                 | 2      | -2.321(-5.49-0.848)                        | 0.148                                | 0.197                 | 0.146                        | 0.003**                                         |
|                                                                                 | 3      | -1.781(-4.806-1.244)                       | 0.243                                | 0.296                 | 0.099                        | 0.01*                                           |
|                                                                                 | 4      | -2.107(-5.001-0.786)                       | 0.15                                 | 0.374                 | 0.079                        | 0.016*                                          |
| BMI (kg/m <sup>2</sup> )                                                        | 1      | 1.058(-0.32-2.435)                         | 0.129                                | 0.043                 | 0.043                        | 0.129                                           |
|                                                                                 | 2      | 1.014(-0.38-2.408)                         | 0.15                                 | 0.049                 | 0.006                        | 0.555                                           |
|                                                                                 | 3      | 0.918(-0.489-2.325)                        | 0.196                                | 0.068                 | 0.019                        | 0.311                                           |
|                                                                                 | 4      | 0.855(-0.559-2.268)                        | 0.23                                 | 0.086                 | 0.018                        | 0.325                                           |
| Resting heart rate (bpm)                                                        | 1      | -2.128(-5.851-1.594)                       | 0.257                                | 0.024                 | 0.024                        | 0.257                                           |
|                                                                                 | 2      | -1.778(-5.445-1.89)                        | 0.335                                | 0.082                 | 0.058                        | 0.076                                           |
|                                                                                 | 3      | -1.701(-5.436-2.034)                       | 0.365                                | 0.084                 | 0.002                        | 0.76                                            |
|                                                                                 | 4      | -1.935(-5.653-1.783)                       | 0.301                                | 0.118                 | 0.034                        | 0.168                                           |
| Systolic blood pressure                                                         | 1      | 3.907(-3.97-11.784)                        | 0.324                                | 0.018                 | 0.018                        | 0.324                                           |
|                                                                                 | 2      | 4.679(-3.061-12.42)                        | 0.231                                | 0.081                 | 0.063                        | 0.065                                           |
|                                                                                 | 3      | 5.343(-2.424-13.11)                        | 0.173                                | 0.11                  | 0.029                        | 0.206                                           |
|                                                                                 | 4      | 5.798(-1.952-13.548)                       | 0.139                                | 0.139                 | 0.029                        | 0.199                                           |
| Diastolic blood pressure                                                        | 1      | 1.694(-2.393-5.781)                        | 0.409                                | 0.013                 | 0.013                        | 0.409                                           |
|                                                                                 | 2      | 1.948(-2.149-6.046)                        | 0.344                                | 0.038                 | 0.025                        | 0.246                                           |
|                                                                                 | 3      | 2.266(-1.857-6.39)                         | 0.275                                | 0.063                 | 0.025                        | 0.254                                           |
|                                                                                 | 4      | 1.821(-2.123-5.765)                        | 0.358                                | 0.167                 | 0.104                        | 0.016                                           |
| Natural log-transformed delta FHS score                                         | 1      | 0.191(-0.078-0.46)                         | 0.161                                | 0.037                 | 0.037                        | 0.161                                           |
|                                                                                 | 2      | 0.22(-0.042-0.482)                         | 0.098                                | 0.114                 | 0.078                        | 0.038                                           |
|                                                                                 | 3      | 0.232(-0.034-0.497)                        | 0.086                                | 0.121                 | 0.007                        | 0.522                                           |
|                                                                                 | 4      | 0.246(-0.02-0.512)                         | 0.07                                 | 0.145                 | 0.024                        | 0.243                                           |

Footnotes: CP= cerebral palsy; MCI=mild cognitive impairment; hs-CRP=high-sensitivity C-reactive protein; BDNF=brain-derived neurotrophic factor; #Semantic fluency (60-second animal naming); WAIS= Wechsler Adult Intelligence Scale, BMI= Body-mass index; bpm= beats per minute; FHS=Framingham heart study; 95% CI=95% confidence interval. \* indicates <0.05, \*\* indicates <0.01, \*\*\* indicates <0.001. Model 1: no covariates, Model 2: added gender, Model 3: added years of formal education (in years), Model 4: added chronological age (in years).

**Supplementary Table 4A. Shared and distinct biomarkers, neurocognitive, and anthropometric measures between adults with CP and MCI.**

| Dependent variable:<br>Biomarkers / Neurocognitive /<br>Anthropometric measures | Models | Independent variable: CP versus MCI cohorts |                                      |                       |                              |                                                 |
|---------------------------------------------------------------------------------|--------|---------------------------------------------|--------------------------------------|-----------------------|------------------------------|-------------------------------------------------|
|                                                                                 |        | $\beta$ (95% CI)                            | <i>P</i> -value of regression models | <i>R</i> <sup>2</sup> | <i>R</i> <sup>2</sup> Change | <i>P</i> -value of <i>R</i> <sup>2</sup> Change |
| Log-transformed hs-CRP                                                          | 1      | 0.236(0.055-0.418)                          | 0.011*                               | 0.06                  | 0.06                         | 0.011*                                          |
|                                                                                 | 2      | 0.244(0.058-0.431)                          | 0.011*                               | 0.061                 | 0.001                        | 0.695                                           |
|                                                                                 | 3      | 0.213(-0.08-0.505)                          | 0.152                                | 0.062                 | 0.001                        | 0.781                                           |
| Log-transformed BDNF                                                            | 1      | 4.222(3.76-4.683)                           | <0.001***                            | 0.758                 | 0.758                        | <0.001***                                       |
|                                                                                 | 2      | 4.247(3.773-4.722)                          | <0.001***                            | 0.759                 | 0.001                        | 0.62                                            |
|                                                                                 | 3      | 3.906(3.168-4.645)                          | <0.001***                            | 0.762                 | 0.003                        | 0.235                                           |
| Semantic Fluency#                                                               | 1      | -3.848(-7.921-0.225)                        | 0.064                                | 0.032                 | 0.032                        | 0.064                                           |
|                                                                                 | 2      | -3.307(-7.471-0.856)                        | 0.118                                | 0.045                 | 0.013                        | 0.236                                           |
|                                                                                 | 3      | 4.748(-1.447-10.944)                        | 0.132                                | 0.14                  | 0.094                        | 0.001**                                         |
| WAIS-V Block Design                                                             | 1      | -3.848(-7.921-0.225)                        | 0.064                                | 0.032                 | 0.032                        | 0.064                                           |
|                                                                                 | 2      | -3.307(-7.471-0.856)                        | 0.118                                | 0.045                 | 0.013                        | 0.236                                           |
|                                                                                 | 3      | 4.748(-1.447-10.944)                        | 0.132                                | 0.14                  | 0.094                        | 0.001**                                         |
| BMI (kg/m <sup>2</sup> )                                                        | 1      | -0.3(-2.218-1.619)                          | 0.757                                | 0.001                 | 0.001                        | 0.757                                           |
|                                                                                 | 2      | -0.546(-2.508-1.416)                        | 0.582                                | 0.013                 | 0.013                        | 0.253                                           |
|                                                                                 | 3      | -1.088(-4.16-1.984)                         | 0.484                                | 0.015                 | 0.002                        | 0.649                                           |
| Resting heart rate (bpm)                                                        | 1      | -8.21(-12.444--3.977)                       | <0.001***                            | 0.123                 | 0.123                        | <0.001***                                       |
|                                                                                 | 2      | -8.344(-12.7--3.988)                        | <0.001***                            | 0.124                 | 0.001                        | 0.779                                           |
|                                                                                 | 3      | -4.759(-11.525-2.007)                       | 0.166                                | 0.14                  | 0.016                        | 0.174                                           |
| Systolic blood pressure                                                         | 1      | 16.288(9.633-22.943)                        | <0.001***                            | 0.183                 | 0.183                        | <0.001***                                       |
|                                                                                 | 2      | 17.569(10.817-24.321)                       | <0.001***                            | 0.206                 | 0.023                        | 0.085                                           |
|                                                                                 | 3      | 22.19(11.672-32.707)                        | <0.001***                            | 0.216                 | 0.01                         | 0.259                                           |
| Diastolic blood pressure                                                        | 1      | -3.18(-6.665-0.305)                         | 0.073                                | 0.03                  | 0.03                         | 0.073                                           |
|                                                                                 | 2      | -2.698(-6.259-0.863)                        | 0.136                                | 0.044                 | 0.014                        | 0.217                                           |
|                                                                                 | 3      | 1.159(-4.335-6.654)                         | 0.676                                | 0.074                 | 0.03                         | 0.073                                           |
| Natural log-transformed delta FHS score                                         | 1      | 1.787(1.5-2.075)                            | <0.001***                            | 0.591                 | 0.591                        | <0.001***                                       |
|                                                                                 | 2      | 1.868(1.581-2.155)                          | <0.001***                            | 0.615                 | 0.024                        | 0.012*                                          |
|                                                                                 | 3      | 2.079(1.632-2.526)                          | <0.001***                            | 0.621                 | 0.005                        | 0.225                                           |

Footnotes: CP= cerebral palsy; MCI=mild cognitive impairment; hs-CRP=high-sensitivity C-reactive protein; BDNF=brain-derived neurotrophic factor; #Semantic fluency (60-second animal naming); WAIS= Wechsler Adult Intelligence Scale; BMI= Body-mass index; bpm= beats per minute; FHS=Framingham heart study; 95% CI=95% confidence interval. \* indicates <0.05, \*\* indicates <0.01, \*\*\* indicates <0.001. Model 1: no covariates, Model 2: added gender, Model 3: added years of formal education (in years).

**Supplementary Table 4B. Associations of hs-CRP with biomarker, neurocognitive, and anthropometric measures.**

| Dependent variable:<br>Biomarkers / Neurocognitive /<br>Anthropometric measures | Models | Independent variable: Log-transformed hs-CRP |                                      |                       |                              |                                                 |
|---------------------------------------------------------------------------------|--------|----------------------------------------------|--------------------------------------|-----------------------|------------------------------|-------------------------------------------------|
|                                                                                 |        | $\beta$ (95% CI)                             | <i>P</i> -value of regression models | <i>R</i> <sup>2</sup> | <i>R</i> <sup>2</sup> Change | <i>P</i> -value of <i>R</i> <sup>2</sup> Change |
| Log-transformed BDNF                                                            | 1      | 1.46(0.531-2.388)                            | 0.002**                              | 0.085                 | 0.085                        | 0.002**                                         |
|                                                                                 | 2      | 1.446(0.527-2.366)                           | 0.002**                              | 0.11                  | 0.026                        | 0.086                                           |
|                                                                                 | 3      | 0.761(0.074-1.448)                           | 0.03*                                | 0.53                  | 0.419                        | <0.001***                                       |
|                                                                                 | 4      | 0.405(-0.084-0.895)                          | 0.104                                | 0.768                 | 0.238                        | <0.001***                                       |
| Semantic Fluency#                                                               | 1      | -1.993(-3.704--0.281)                        | 0.023*                               | 0.048                 | 0.048                        | 0.023*                                          |
|                                                                                 | 2      | -1.985(-3.703--0.268)                        | 0.024                                | 0.051                 | 0.002                        | 0.611                                           |
|                                                                                 | 3      | -1.424(-3.106-0.258)                         | 0.096                                | 0.137                 | 0.086                        | 0.002**                                         |
|                                                                                 | 4      | -1.414(-3.122-0.294)                         | 0.104                                | 0.137                 | 0                            | 0.936                                           |
| WAIS-V Block Design                                                             | 1      | -3.744(-7.965-0.476)                         | 0.081                                | 0.029                 | 0.029                        | 0.081                                           |
|                                                                                 | 2      | -3.691(-7.885-0.503)                         | 0.084                                | 0.05                  | 0.022                        | 0.125                                           |
|                                                                                 | 3      | -2.363(-6.483-1.757)                         | 0.258                                | 0.131                 | 0.081                        | 0.003**                                         |
|                                                                                 | 4      | -2.862(-6.986-1.262)                         | 0.172                                | 0.155                 | 0.024                        | 0.091                                           |
| BMI (kg/m <sup>2</sup> )                                                        | 1      | 3.308(1.429-5.187)                           | 0.001**                              | 0.104                 | 0.104                        | 0.001**                                         |
|                                                                                 | 2      | 3.292(1.413-5.17)                            | 0.001**                              | 0.114                 | 0.01                         | 0.293                                           |
|                                                                                 | 3      | 3.466(1.544-5.388)                           | 0.001**                              | 0.12                  | 0.007                        | 0.385                                           |
|                                                                                 | 4      | 3.64(1.704-5.576)                            | <0.001***                            | 0.134                 | 0.014                        | 0.21                                            |
| Resting heart rate (bpm)                                                        | 1      | -4.533(-9.127-0.061)                         | 0.053                                | 0.035                 | 0.035                        | 0.053                                           |
|                                                                                 | 2      | -4.514(-9.126-0.097)                         | 0.055                                | 0.037                 | 0.002                        | 0.621                                           |
|                                                                                 | 3      | -2.903(-7.387-1.582)                         | 0.202                                | 0.137                 | 0.1                          | 0.001**                                         |
|                                                                                 | 4      | -2.509(-7.027-2.01)                          | 0.273                                | 0.15                  | 0.013                        | 0.223                                           |
| Systolic blood pressure                                                         | 1      | 6.887(-0.611-14.385)                         | 0.071                                | 0.031                 | 0.031                        | 0.071                                           |
|                                                                                 | 2      | 6.925(-0.598-14.448)                         | 0.071                                | 0.034                 | 0.003                        | 0.544                                           |
|                                                                                 | 3      | 4.836(-2.633-12.305)                         | 0.202                                | 0.097                 | 0.063                        | 0.008**                                         |
|                                                                                 | 4      | 2.824(-4.22-9.868)                           | 0.428                                | 0.221                 | 0.124                        | <0.001***                                       |
| Diastolic blood pressure                                                        | 1      | -1.356(-5.007-2.295)                         | 0.463                                | 0.005                 | 0.005                        | 0.463                                           |
|                                                                                 | 2      | -1.309(-4.935-2.317)                         | 0.476                                | 0.028                 | 0.023                        | 0.117                                           |
|                                                                                 | 3      | -0.466(-4.104-3.172)                         | 0.8                                  | 0.073                 | 0.045                        | 0.028*                                          |
|                                                                                 | 4      | -0.586(-4.275-3.103)                         | 0.753                                | 0.075                 | 0.002                        | 0.649                                           |
| Natural log-transformed delta FHS score                                         | 1      | 0.757(0.315-1.199)                           | 0.001**                              | 0.099                 | 0.099                        | 0.001**                                         |
|                                                                                 | 2      | 0.757(0.313-1.201)                           | 0.001**                              | 0.099                 | 0                            | 0.928                                           |
|                                                                                 | 3      | 0.503(0.115-0.89)                            | 0.011*                               | 0.349                 | 0.25                         | <0.001***                                       |
|                                                                                 | 4      | 0.315(0.021-0.609)                           | 0.036*                               | 0.637                 | 0.288                        | <0.001***                                       |

Footnotes: CP= cerebral palsy; MCI=mild cognitive impairment; hs-CRP=high-sensitivity C-reactive protein; BDNF=brain-derived neurotrophic factor; #Semantic fluency (60-second animal naming); WAIS= Wechsler Adult Intelligence Scale, BMI= Body-mass index; bpm= beats per minute; FHS=Framingham heart study; 95% CI=95% confidence interval. \* indicates <0.05, \*\* indicates <0.01, \*\*\* indicates <0.00. Model 1: no covariates, Model 2: added gender, Model 3: added years of formal education (in years), Model 4: added "CP VS MCI cohort"

**Supplementary Table 4C. Associations of natural log-transformed delta FHS score with biomarker, neurocognitive, and anthropometric measures for CP cohort.**

| Dependent variable:<br>Biomarkers / Neurocognitive /<br>Anthropometric measures | Models | Independent variable: Natural log-transformed delta FHS score |                                      |                       |                              |                                                 |
|---------------------------------------------------------------------------------|--------|---------------------------------------------------------------|--------------------------------------|-----------------------|------------------------------|-------------------------------------------------|
|                                                                                 |        | $\beta$ (95% CI)                                              | <i>P</i> -value of regression models | <i>R</i> <sup>2</sup> | <i>R</i> <sup>2</sup> Change | <i>P</i> -value of <i>R</i> <sup>2</sup> Change |
| Log-transformed hs-CRP                                                          | 1      | 0.225(-0.238-0.688)                                           | 0.334                                | 0.019                 | 0.019                        | 0.334                                           |
|                                                                                 | 2      | 0.241(-0.243-0.724)                                           | 0.322                                | 0.02                  | 0.001                        | 0.799                                           |
|                                                                                 | 3      | 0.263(-0.232-0.757)                                           | 0.291                                | 0.026                 | 0.006                        | 0.594                                           |
|                                                                                 | 4      | 0.539(-0.009-1.088)                                           | 0.054                                | 0.108                 | 0.082                        | 0.043*                                          |
| Log-transformed BDNF                                                            | 1      | 0.006(-0.385-0.398)                                           | 0.974                                | 0                     | 0                            | 0.974                                           |
|                                                                                 | 2      | 0.073(-0.33-0.475)                                            | 0.719                                | 0.033                 | 0.033                        | 0.2                                             |
|                                                                                 | 3      | 0.077(-0.336-0.49)                                            | 0.709                                | 0.034                 | 0                            | 0.899                                           |
|                                                                                 | 4      | 0.18(-0.294-0.655)                                            | 0.448                                | 0.05                  | 0.016                        | 0.374                                           |
| Semantic Fluency#                                                               | 1      | 4.531(0.238-8.825)                                            | 0.039*                               | 0.082                 | 0.082                        | 0.039*                                          |
|                                                                                 | 2      | 4.995(0.539-9.451)                                            | 0.029*                               | 0.095                 | 0.012                        | 0.415                                           |
|                                                                                 | 3      | 4.766(0.214-9.318)                                            | 0.041*                               | 0.102                 | 0.007                        | 0.549                                           |
|                                                                                 | 4      | 3.708(-1.527-8.943)                                           | 0.161                                | 0.115                 | 0.013                        | 0.409                                           |
| WAIS-V Block Design                                                             | 1      | -5.343(-15.434-4.749)                                         | 0.293                                | 0.022                 | 0.022                        | 0.293                                           |
|                                                                                 | 2      | -4.943(-15.48-5.593)                                          | 0.35                                 | 0.024                 | 0.002                        | 0.766                                           |
|                                                                                 | 3      | -6.271(-16.829-4.286)                                         | 0.238                                | 0.068                 | 0.044                        | 0.138                                           |
|                                                                                 | 4      | -7.605(-19.809-4.6)                                           | 0.216                                | 0.072                 | 0.004                        | 0.654                                           |
| BMI (kg/m <sup>2</sup> )                                                        | 1      | 1.22(-3.955-6.395)                                            | 0.638                                | 0.004                 | 0.004                        | 0.638                                           |
|                                                                                 | 2      | 1.898(-3.456-7.252)                                           | 0.48                                 | 0.024                 | 0.02                         | 0.322                                           |
|                                                                                 | 3      | 1.749(-3.735-7.232)                                           | 0.525                                | 0.027                 | 0.002                        | 0.745                                           |
|                                                                                 | 4      | 1.069(-5.271-7.409)                                           | 0.736                                | 0.031                 | 0.004                        | 0.661                                           |
| Resting heart rate (bpm)                                                        | 1      | 0.379(-9.848-10.606)                                          | 0.941                                | 0                     | 0                            | 0.941                                           |
|                                                                                 | 2      | 2.642(-7.736-13.021)                                          | 0.611                                | 0.057                 | 0.057                        | 0.091                                           |
|                                                                                 | 3      | 2.416(-8.219-13.052)                                          | 0.65                                 | 0.058                 | 0.001                        | 0.8                                             |
|                                                                                 | 4      | 1.442(-10.865-13.75)                                          | 0.815                                | 0.061                 | 0.002                        | 0.746                                           |
| Systolic blood pressure                                                         | 1      | 2.847(-7.406-13.099)                                          | 0.58                                 | 0.006                 | 0.006                        | 0.58                                            |
|                                                                                 | 2      | 2.457(-8.249-13.163)                                          | 0.647                                | 0.008                 | 0.002                        | 0.775                                           |
|                                                                                 | 3      | 3.167(-7.742-14.076)                                          | 0.562                                | 0.02                  | 0.012                        | 0.439                                           |
|                                                                                 | 4      | 0.346(-12.177-12.87)                                          | 0.956                                | 0.038                 | 0.018                        | 0.358                                           |
| Diastolic blood pressure                                                        | 1      | 6.4(0.916-11.884)                                             | 0.023*                               | 0.099                 | 0.099                        | 0.023*                                          |
|                                                                                 | 2      | 6.264(0.535-11.993)                                           | 0.033*                               | 0.1                   | 0.001                        | 0.852                                           |
|                                                                                 | 3      | 6.162(0.29-12.034)                                            | 0.04*                                | 0.1                   | 0.001                        | 0.836                                           |
|                                                                                 | 4      | 5.2(-1.578-11.978)                                            | 0.129                                | 0.107                 | 0.007                        | 0.561                                           |

Footnotes: CP= cerebral palsy; MCI=mild cognitive impairment; hs-CRP=high-sensitivity C-reactive protein; BDNF=brain-derived neurotrophic factor; #Semantic fluency (60-second animal naming); WAIS= Wechsler Adult Intelligence Scale, BMI= Body-mass index; bpm= beats per minute; FHS=Framingham heart study; 95% CI=95% confidence interval. \* indicates <0.05, \*\* indicates <0.01, \*\*\* indicates <0.001. Model 1: no covariates, Model 2: added gender, Model 3: added years of formal education (in years), Model 4: added chronological age (in years).

**Supplementary Table 4D. Associations of natural log-transformed delta FHS score with biomarker, neurocognitive, and anthropometric measures for MCI cohort.**

| Dependent variable:<br>Biomarkers / Neurocognitive /<br>Anthropometric measures | Models | Independent variable: Natural log-transformed delta FHS score |                                      |                       |                              |                                                 |
|---------------------------------------------------------------------------------|--------|---------------------------------------------------------------|--------------------------------------|-----------------------|------------------------------|-------------------------------------------------|
|                                                                                 |        | $\beta$ (95% CI)                                              | <i>P</i> -value of regression models | <i>R</i> <sup>2</sup> | <i>R</i> <sup>2</sup> Change | <i>P</i> -value of <i>R</i> <sup>2</sup> Change |
| Log-transformed hs-CRP                                                          | 1      | 0.073(-0.073-0.218)                                           | 0.321                                | 0.019                 | 0.019                        | 0.321                                           |
|                                                                                 | 2      | 0.069(-0.083-0.22)                                            | 0.368                                | 0.019                 | 0.001                        | 0.842                                           |
|                                                                                 | 3      | 0.07(-0.084-0.223)                                            | 0.367                                | 0.02                  | 0.001                        | 0.851                                           |
|                                                                                 | 4      | 0.071(-0.086-0.227)                                           | 0.368                                | 0.02                  | 0                            | 0.91                                            |
| Log-transformed BDNF                                                            | 1      | 0.193(-0.079-0.465)                                           | 0.161                                | 0.037                 | 0.037                        | 0.161                                           |
|                                                                                 | 2      | 0.236(-0.045-0.516)                                           | 0.098                                | 0.063                 | 0.026                        | 0.237                                           |
|                                                                                 | 3      | 0.244(-0.036-0.524)                                           | 0.086                                | 0.084                 | 0.021                        | 0.281                                           |
|                                                                                 | 4      | 0.262(-0.022-0.546)                                           | 0.07                                 | 0.099                 | 0.015                        | 0.365                                           |
| Semantic Fluency#                                                               | 1      | -0.795(-1.914-0.324)                                          | 0.16                                 | 0.037                 | 0.037                        | 0.16                                            |
|                                                                                 | 2      | -0.933(-2.093-0.227)                                          | 0.113                                | 0.053                 | 0.016                        | 0.356                                           |
|                                                                                 | 3      | -0.998(-2.126-0.129)                                          | 0.082                                | 0.125                 | 0.073                        | 0.045*                                          |
|                                                                                 | 4      | -0.908(-2.043-0.227)                                          | 0.115                                | 0.148                 | 0.023                        | 0.251                                           |
| WAIS-V Block Design                                                             | 1      | 0.974(-2.515-4.464)                                           | 0.578                                | 0.006                 | 0.006                        | 0.578                                           |
|                                                                                 | 2      | -0.367(-3.711-2.978)                                          | 0.827                                | 0.164                 | 0.158                        | 0.003**                                         |
|                                                                                 | 3      | -0.617(-3.761-2.526)                                          | 0.695                                | 0.279                 | 0.114                        | 0.006**                                         |
|                                                                                 | 4      | -0.137(-3.187-2.913)                                          | 0.929                                | 0.347                 | 0.069                        | 0.026*                                          |
| BMI (kg/m <sup>2</sup> )                                                        | 1      | 1.13(-0.251-2.511)                                            | 0.107                                | 0.048                 | 0.048                        | 0.107                                           |
|                                                                                 | 2      | 1.354(-0.069-2.776)                                           | 0.062                                | 0.075                 | 0.027                        | 0.225                                           |
|                                                                                 | 3      | 1.407(-0.008-2.822)                                           | 0.051                                | 0.107                 | 0.032                        | 0.184                                           |
|                                                                                 | 4      | 1.546(0.132-2.96)                                             | 0.033*                               | 0.142                 | 0.035                        | 0.158                                           |
| Resting heart rate (bpm)                                                        | 1      | -1.047(-4.826-2.731)                                          | 0.581                                | 0.006                 | 0.006                        | 0.581                                           |
|                                                                                 | 2      | -2.086(-5.87-1.698)                                           | 0.274                                | 0.087                 | 0.081                        | 0.037*                                          |
|                                                                                 | 3      | -2.139(-5.959-1.68)                                           | 0.266                                | 0.091                 | 0.004                        | 0.62                                            |
|                                                                                 | 4      | -1.833(-5.678-2.012)                                          | 0.343                                | 0.115                 | 0.024                        | 0.251                                           |
| Systolic blood pressure                                                         | 1      | 12.413(5.187-19.639)                                          | 0.001**                              | 0.183                 | 0.183                        | 0.001**                                         |
|                                                                                 | 2      | 11.414(3.941-18.886)                                          | 0.003**                              | 0.2                   | 0.017                        | 0.3                                             |
|                                                                                 | 3      | 11.202(3.715-18.69)                                           | 0.004**                              | 0.215                 | 0.016                        | 0.319                                           |
|                                                                                 | 4      | 10.77(3.184-18.356)                                           | 0.006**                              | 0.226                 | 0.011                        | 0.41                                            |
| Diastolic blood pressure                                                        | 1      | -0.11(-4.246-4.026)                                           | 0.958                                | 0                     | 0                            | 0.958                                           |
|                                                                                 | 2      | -0.722(-4.993-3.549)                                          | 0.736                                | 0.024                 | 0.024                        | 0.267                                           |
|                                                                                 | 3      | -0.846(-5.123-3.432)                                          | 0.693                                | 0.043                 | 0.02                         | 0.309                                           |
|                                                                                 | 4      | -0.13(-4.236-3.977)                                           | 0.95                                 | 0.153                 | 0.109                        | 0.014*                                          |

Footnotes: CP= cerebral palsy; MCI=mild cognitive impairment; hs-CRP=high-sensitivity C-reactive protein; BDNF=brain-derived neurotrophic factor; #Semantic fluency (60-second animal naming); WAIS= Wechsler Adult Intelligence Scale, BMI= Body-mass index; bpm= beats per minute; FHS=Framingham heart study; 95% CI=95% confidence interval. \* indicates <0.05, \*\* indicates <0.01, \*\*\* indicates <0.001. Model 1: no covariates, Model 2: added gender, Model 3: added years of formal education (in years), Model 4: added chronological age (in years).

**Supplementary Table 4E. Associations of BDNF with biomarker, neurocognitive, and anthropometric measures CP cohort.**

| Dependent variable:<br>Biomarkers / Neurocognitive /<br>Anthropometric measures | Models | Independent variable: Log-transformed BDNF |                                      |                       |                              |                                                 |
|---------------------------------------------------------------------------------|--------|--------------------------------------------|--------------------------------------|-----------------------|------------------------------|-------------------------------------------------|
|                                                                                 |        | $\beta$ (95% CI)                           | <i>P</i> -value of regression models | <i>R</i> <sup>2</sup> | <i>R</i> <sup>2</sup> Change | <i>P</i> -value of <i>R</i> <sup>2</sup> Change |
| Log-transformed hs-CRP                                                          | 1      | 0.363(0.04-0.686)                          | 0.028*                               | 0.093                 | 0.093                        | 0.028*                                          |
|                                                                                 | 2      | 0.375(0.044-0.706)                         | 0.027*                               | 0.096                 | 0.003                        | 0.694                                           |
|                                                                                 | 3      | 0.374(0.04-0.708)                          | 0.029*                               | 0.098                 | 0.002                        | 0.724                                           |
|                                                                                 | 4      | 0.358(0.023-0.693)                         | 0.037*                               | 0.12                  | 0.022                        | 0.28                                            |
| Semantic Fluency#                                                               | 1      | 2.21(-0.978-5.398)                         | 0.17                                 | 0.037                 | 0.037                        | 0.17                                            |
|                                                                                 | 2      | 2.208(-1.064-5.48)                         | 0.181                                | 0.037                 | 0                            | 0.994                                           |
|                                                                                 | 3      | 2.223(-1.054-5.499)                        | 0.179                                | 0.055                 | 0.018                        | 0.342                                           |
|                                                                                 | 4      | 2.484(-0.723-5.69)                         | 0.126                                | 0.122                 | 0.067                        | 0.065                                           |
| WAIS-V Block Design                                                             | 1      | 4.446(-2.843-11.735)                       | 0.226                                | 0.029                 | 0.029                        | 0.226                                           |
|                                                                                 | 2      | 4.216(-3.257-11.689)                       | 0.262                                | 0.032                 | 0.002                        | 0.726                                           |
|                                                                                 | 3      | 4.263(-3.155-11.681)                       | 0.254                                | 0.066                 | 0.035                        | 0.188                                           |
|                                                                                 | 4      | 4.235(-3.294-11.763)                       | 0.264                                | 0.066                 | 0                            | 0.932                                           |
| BMI (kg/m <sup>2</sup> )                                                        | 1      | 3.198(-0.451-6.846)                        | 0.084                                | 0.058                 | 0.058                        | 0.084                                           |
|                                                                                 | 2      | 3.013(-0.72-6.746)                         | 0.111                                | 0.065                 | 0.006                        | 0.573                                           |
|                                                                                 | 3      | 3.021(-0.744-6.787)                        | 0.113                                | 0.069                 | 0.004                        | 0.644                                           |
|                                                                                 | 4      | 3.162(-0.63-6.954)                         | 0.1                                  | 0.083                 | 0.014                        | 0.395                                           |
| Resting heart rate (bpm)                                                        | 1      | 2.851(-4.519-10.22)                        | 0.441                                | 0.012                 | 0.012                        | 0.441                                           |
|                                                                                 | 2      | 1.864(-5.526-9.254)                        | 0.615                                | 0.057                 | 0.045                        | 0.132                                           |
|                                                                                 | 3      | 1.876(-5.586-9.338)                        | 0.616                                | 0.059                 | 0.002                        | 0.735                                           |
|                                                                                 | 4      | 2.056(-5.494-9.605)                        | 0.586                                | 0.065                 | 0.006                        | 0.583                                           |
| Systolic blood pressure                                                         | 1      | -0.517(-7.971-6.937)                       | 0.89                                 | 0                     | 0                            | 0.89                                            |
|                                                                                 | 2      | -0.251(-7.89-7.388)                        | 0.948                                | 0.004                 | 0.003                        | 0.691                                           |
|                                                                                 | 3      | -0.276(-7.961-7.408)                       | 0.943                                | 0.013                 | 0.01                         | 0.493                                           |
|                                                                                 | 4      | 0.087(-7.616-7.789)                        | 0.982                                | 0.038                 | 0.024                        | 0.28                                            |
| Diastolic blood pressure                                                        | 1      | -2.219(-6.359-1.922)                       | 0.287                                | 0.023                 | 0.023                        | 0.287                                           |
|                                                                                 | 2      | -2.01(-6.246-2.226)                        | 0.345                                | 0.029                 | 0.006                        | 0.574                                           |
|                                                                                 | 3      | -1.999(-6.269-2.271)                       | 0.351                                | 0.035                 | 0.006                        | 0.591                                           |
|                                                                                 | 4      | -1.738(-5.98-2.505)                        | 0.414                                | 0.075                 | 0.04                         | 0.16                                            |
| Natural log-transformed delta FHS score                                         | 1      | 0.003(-0.203-0.209)                        | 0.974                                | 0                     | 0                            | 0.974                                           |
|                                                                                 | 2      | 0.037(-0.167-0.241)                        | 0.719                                | 0.067                 | 0.067                        | 0.066                                           |
|                                                                                 | 3      | 0.038(-0.165-0.241)                        | 0.709                                | 0.094                 | 0.026                        | 0.242                                           |
|                                                                                 | 4      | 0.068(-0.111-0.248)                        | 0.448                                | 0.316                 | 0.222                        | <0.001***                                       |

Footnotes: CP= cerebral palsy; MCI=mild cognitive impairment; hs-CRP=high-sensitivity C-reactive protein; BDNF=brain-derived neurotrophic factor; #Semantic fluency (60-second animal naming); WAIS= Wechsler Adult Intelligence Scale, BMI= Body-mass index; bpm= beats per minute; FHS=Framingham heart study; 95% CI=95% confidence interval. \* indicates <0.05, \*\* indicates <0.01, \*\*\* indicates <0.001. Model 1: no covariates, Model 2: added gender, Model 3: added years of formal education (in years), Model 4: added chronological age (in years).

**Supplementary Table 4F. Associations of BDNF with biomarker, neurocognitive, and anthropometric measures MCI cohort.**

| Dependent variable:<br>Biomarkers / Neurocognitive /<br>Anthropometric measures | Models | Independent variable: Log-transformed BDNF |                                      |                       |                              |                                                 |
|---------------------------------------------------------------------------------|--------|--------------------------------------------|--------------------------------------|-----------------------|------------------------------|-------------------------------------------------|
|                                                                                 |        | $\beta$ (95% CI)                           | <i>P</i> -value of regression models | <i>R</i> <sup>2</sup> | <i>R</i> <sup>2</sup> Change | <i>P</i> -value of <i>R</i> <sup>2</sup> Change |
| Log-transformed hs-CRP                                                          | 1      | 0.07(-0.075-0.214)                         | 0.337                                | 0.017                 | 0.017                        | 0.337                                           |
|                                                                                 | 2      | 0.074(-0.072-0.221)                        | 0.314                                | 0.023                 | 0.006                        | 0.582                                           |
|                                                                                 | 3      | 0.074(-0.075-0.223)                        | 0.323                                | 0.023                 | 0                            | 0.997                                           |
|                                                                                 | 4      | 0.075(-0.077-0.226)                        | 0.326                                | 0.023                 | 0                            | 0.919                                           |
| Semantic Fluency#                                                               | 1      | -0.928(-2.033-0.177)                       | 0.098                                | 0.051                 | 0.051                        | 0.098                                           |
|                                                                                 | 2      | -0.907(-2.028-0.214)                       | 0.111                                | 0.053                 | 0.002                        | 0.72                                            |
|                                                                                 | 3      | -0.778(-1.889-0.332)                       | 0.166                                | 0.106                 | 0.053                        | 0.089                                           |
|                                                                                 | 4      | -0.854(-1.955-0.247)                       | 0.126                                | 0.146                 | 0.04                         | 0.132                                           |
| WAIS-V Block Design                                                             | 1      | -2.836(-6.228-0.556)                       | 0.099                                | 0.05                  | 0.05                         | 0.099                                           |
|                                                                                 | 2      | -2.321(-5.49-0.848)                        | 0.148                                | 0.197                 | 0.146                        | 0.003**                                         |
|                                                                                 | 3      | -1.781(-4.806-1.244)                       | 0.243                                | 0.296                 | 0.099                        | 0.01*                                           |
|                                                                                 | 4      | -2.107(-5.001-0.786)                       | 0.15                                 | 0.374                 | 0.079                        | 0.016*                                          |
| BMI (kg/m <sup>2</sup> )                                                        | 1      | 1.058(-0.32-2.435)                         | 0.129                                | 0.043                 | 0.043                        | 0.129                                           |
|                                                                                 | 2      | 1.014(-0.38-2.408)                         | 0.15                                 | 0.049                 | 0.006                        | 0.555                                           |
|                                                                                 | 3      | 0.918(-0.489-2.325)                        | 0.196                                | 0.068                 | 0.019                        | 0.311                                           |
|                                                                                 | 4      | 0.855(-0.559-2.268)                        | 0.23                                 | 0.086                 | 0.018                        | 0.325                                           |
| Resting heart rate (bpm)                                                        | 1      | -2.128(-5.851-1.594)                       | 0.257                                | 0.024                 | 0.024                        | 0.257                                           |
|                                                                                 | 2      | -1.778(-5.445-1.89)                        | 0.335                                | 0.082                 | 0.058                        | 0.076                                           |
|                                                                                 | 3      | -1.701(-5.436-2.034)                       | 0.365                                | 0.084                 | 0.002                        | 0.76                                            |
|                                                                                 | 4      | -1.935(-5.653-1.783)                       | 0.301                                | 0.118                 | 0.034                        | 0.168                                           |
| Systolic blood pressure                                                         | 1      | 3.907(-3.97-11.784)                        | 0.324                                | 0.018                 | 0.018                        | 0.324                                           |
|                                                                                 | 2      | 4.679(-3.061-12.42)                        | 0.231                                | 0.081                 | 0.063                        | 0.065                                           |
|                                                                                 | 3      | 5.343(-2.424-13.11)                        | 0.173                                | 0.11                  | 0.029                        | 0.206                                           |
|                                                                                 | 4      | 5.798(-1.952-13.548)                       | 0.139                                | 0.139                 | 0.029                        | 0.199                                           |
| Diastolic blood pressure                                                        | 1      | 1.694(-2.393-5.781)                        | 0.409                                | 0.013                 | 0.013                        | 0.409                                           |
|                                                                                 | 2      | 1.948(-2.149-6.046)                        | 0.344                                | 0.038                 | 0.025                        | 0.246                                           |
|                                                                                 | 3      | 2.266(-1.857-6.39)                         | 0.275                                | 0.063                 | 0.025                        | 0.254                                           |
|                                                                                 | 4      | 1.821(-2.123-5.765)                        | 0.358                                | 0.167                 | 0.104                        | 0.016*                                          |
| Natural log-transformed delta FHS score                                         | 1      | 0.191(-0.078-0.46)                         | 0.161                                | 0.037                 | 0.037                        | 0.161                                           |
|                                                                                 | 2      | 0.22(-0.042-0.482)                         | 0.098                                | 0.114                 | 0.078                        | 0.038*                                          |
|                                                                                 | 3      | 0.232(-0.034-0.497)                        | 0.086                                | 0.121                 | 0.007                        | 0.522                                           |
|                                                                                 | 4      | 0.246(-0.02-0.512)                         | 0.07                                 | 0.145                 | 0.024                        | 0.243                                           |

Footnotes: CP= cerebral palsy; MCI=mild cognitive impairment; hs-CRP=high-sensitivity C-reactive protein; BDNF=brain-derived neurotrophic factor; #Semantic fluency (60-second animal naming); WAIS= Wechsler Adult Intelligence Scale, BMI= Body-mass index; bpm= beats per minute; FHS=Framingham heart study; 95% CI=95% confidence interval. \* indicates <0.05, \*\* indicates <0.01, \*\*\* indicates <0.001. Model 1: no covariates, Model 2: added gender, Model 3: added years of formal education (in years), Model 4: added chronological age (in years).
